1 **Repurposing of rituximab biosimilars to treat B cell mediated autoimmune diseases**

2

3

4

5 Agata Mostkowska, Guy Rousseau, and Noël J-M Raynal\*

6

7

8 Department of Pharmacology and Physiology, Faculty of Medicine, University of Montreal, Quebec,

9 H3T 1C5, Canada

10

11

12

13

14 **\*Corresponding author:** noel.raynal@umontreal.ca

15

16

17

18

19

20 **Keywords:** rituximab, biosimilars, monoclonal antibodies, immunotherapy, biological therapy, off-label  
21 use, drug repurposing, autoimmune diseases

22

23

1 **Abstract**

2

3 Rituximab, the first monoclonal antibody approved for the treatment of lymphoma, eventually became  
4 one of the most popular and versatile drugs ever in terms of clinical application and revenue. Since its  
5 patent expiration, and consequently, the loss of exclusivity of the original biologic, its repurposing as an  
6 off-label drug has increased dramatically, propelled by the development and commercialization of its  
7 many biosimilars. Currently, rituximab is prescribed worldwide to treat a vast range of autoimmune  
8 diseases mediated by B cells. Here, we present a comprehensive overview of rituximab repurposing in  
9 116 autoimmune diseases across 17 medical specialties, sourced from over 1,530 publications. Our work  
10 highlights the extent of its off-label use and clinical benefits, underlining the success of rituximab  
11 repurposing for both common and orphan immune-related diseases. We discuss the scientific mechanism  
12 associated with its clinical efficacy and provide additional indications for which rituximab could be  
13 investigated. Our study presents rituximab as a flagship example of drug repurposing owing to its central  
14 role in targeting CD20<sup>+</sup> B cells in over 100 autoimmune diseases.

15

## 1 **Introduction**

2  
3 The Food and Drug Administration (FDA) approved rituximab for marketing in the United States (US)  
4 in 1997 under the brand name RITUXAN. This was a watershed moment in the history of monoclonal  
5 antibody (mAb) therapeutics, as rituximab was the first to make its way onto the cancer biologics market.<sup>1</sup>  
6 Although classified as an anticancer agent, rituximab is not considered a chemotherapy but rather an  
7 immunotherapy. Developed by IDEC Pharmaceuticals and later acquired by Biogen (which collaborated  
8 with Genentech and Hoffman-LaRoche shortly thereafter), rituximab was approved as a single agent for  
9 the treatment of relapsed or refractory CD20<sup>+</sup> B cell follicular lymphoma—a subtype of non-Hodgkin  
10 lymphoma.<sup>2</sup> It was later approved for use in combination with chemotherapeutic agents to sensitize  
11 chemoresistant tumor cells to cytotoxic drugs, which improves therapeutic outcomes.<sup>3</sup>

12 Rituximab is a chimeric mAb engineered from human immunoglobulin (Ig) G constant domains  
13 and murine anti-CD20 variable regions. It acts by targeting the cluster of differentiation 20 (CD20)  
14 protein, a cell surface antigen specific to B cells. CD20 is expressed in most but not all stages of B cell  
15 development. A lack thereof renders hematopoietic stem cells and plasma cells unaffected by rituximab  
16 treatment (FIG. 1). The efficacy of rituximab in eliminating CD20<sup>+</sup> B cells is attributed to its unique  
17 three-fold mechanism of action: 1) complement-dependent cytotoxicity, 2) antibody-dependent cell-  
18 mediated cytotoxicity, and 3) induction of apoptosis. Rituximab is a type I CD20 mAb with  
19 approximately double the CD20 binding capacity than its type II counterpart, and is thought to bind in a  
20 way that does not obstruct further antibody binding.<sup>4-8</sup> Its specificity at inducing B cell death makes  
21 rituximab an effective treatment for B cell malignancies.<sup>9</sup> The central role of B cells in autoimmunity is  
22 the common denominator of a wide range of indications and the rationale behind expanding rituximab  
23 use across.<sup>2,10-12</sup>

24 Rituximab's approved applications gradually expanded to include several blood cancers and  
25 autoimmune diseases, namely, chronic lymphocytic leukemia, rheumatoid arthritis (RA), granulomatosis  
26 with polyangiitis, microscopic polyangiitis, as well as pemphigus vulgaris (PV). In 1998, it was approved  
27 for the same indications by the European Medicines Agency (EMA), under the trade name MabThera.  
28 Two years later, Health Canada granted its approval for the same indications (except PV) under the brand  
29 name RITUXAN. The increase in approved indications came with a significant rise in global sales.<sup>13</sup>  
30 What started off as the first mAb approved for the treatment of blood and bone-marrow cancer ended up  
31 being one of the biggest blockbuster drugs of all time. Rituximab sales increased steadily from 5.5 million  
32 USD in 1997 to close to 7.5 billion USD in 2015. Global sales decreased after patents expired in Europe,

1 the US, and Canada in 2013, 2018, and 2019, respectively, with the introduction of biosimilars.<sup>13</sup>  
2 Rituximab’s high demand has ranked it among the top-selling biologics in the world for over 20 years,  
3 providing a lucrative market for rituximab biosimilars after patent expiration.<sup>13</sup> Rituximab use is  
4 expected to increase further as biosimilars reduce the price of treatment.<sup>14</sup> While much of its clinical use  
5 is attributed to cancer (64%) and RA (11%) treatment, approximately 25% of total sales stem from off-  
6 label prescribing.<sup>13-16</sup>

7 The use of existing marketed drugs beyond their clinical indication is known as “drug  
8 repurposing” or “repositioning.”<sup>17</sup> There is great interest in repurposing approved medications in lieu of  
9 testing novel molecular compounds, as approved drugs have already successfully passed costly  
10 toxicological studies, and their pharmacokinetic and pharmacodynamic properties are well characterized.  
11 As such, repurposing de-risked drugs for diseases of similar therapeutic molecular targets encourages  
12 off-label use. The rationale behind prescribing rituximab biosimilars as off-label treatments for  
13 autoimmune and immune-mediated diseases is to abolish self-destructive inflammatory signals mediated  
14 by CD20<sup>+</sup> B cells. In fact, the current literature supports the use of B cell-directed and CD20-targeted  
15 therapies, including rituximab, to treat autoimmune diseases.<sup>10,12,18-23</sup> From a biological standpoint, B  
16 cells contribute to autoimmunity in several ways: they not only produce autoantibodies but also act as  
17 antigen-presenting cells (APCs), reciprocally interact with T cells, and secrete inflammatory cytokines  
18 (FIG. 2).<sup>24</sup> Fundamentally, the underlying strategy when treating autoimmunity is to restore a normal  
19 immune response by eliminating the autoreactive lymphocytes responsible for disease maintenance,  
20 progression, and symptom exacerbation.<sup>25</sup>

21 Revolutionary progress has been made in autoimmune disease management through the use of  
22 nonsteroidal anti-inflammatory drugs, glucocorticoids, conventional disease-modifying antirheumatic  
23 drugs, and newer biologics. However, most autoimmune diseases remain incurable, and providing  
24 symptomatic relief and preventing chronic complications caused by inflammatory responses is the  
25 current standard of care.<sup>26</sup> However, many patients are refractory or intolerant to conventional treatments  
26 and require alternative therapies. Therapeutic mAbs that target select pathways or components of the  
27 immune system may offer more favorable toxicological profiles than non-selective small molecules.<sup>27</sup>  
28 Therefore, immunomodulatory drugs targeting CD20 with demonstrated efficacy and safety profiles have  
29 a promising future.<sup>28</sup> Although rituximab is generally well tolerated, B cell depletion causes side effects  
30 predominantly owing to a dampened immune response.<sup>8,29,30</sup>

31 The purpose of this review is to provide a comprehensive overview of the off-label clinical use  
32 of rituximab as a single agent to treat autoimmune and immune-mediated diseases. Our work is structured

1 around the aforementioned roles of B cells in autoimmune diseases across multiple medical specialties,  
2 including rheumatology, neurology, dermatology, endocrinology, hematology, ophthalmology,  
3 gastroenterology, nephrology, immunology, cardiology, psychiatry, gynecology, pulmonology,  
4 hepatology, otolaryngology, urology, and infectiology. In addition, we describe how B cell depletion  
5 rationalizes rituximab use based on its mechanism of action and the pathophysiology of such disorders.  
6 Key findings are presented by medical discipline, with respective indications discussed for which there  
7 is a scientific rationale for using rituximab based on the involvement of antibodies, antigens, T cells, and  
8 cytokines, all associated with B cell activity. By highlighting the underappreciated possibilities of  
9 rituximab repurposing through different lines of evidence demonstrating treatment benefit, we aim to  
10 inform healthcare professionals on its use and potential for future applications in over 200 B-cell  
11 mediated autoimmune diseases.

12

## 1 **Methodology**

2

### 3 **Information sources for literature search**

4 A literature search for on- and off-label uses of rituximab biosimilars was conducted between September  
5 2021 and September 2022. This analysis started with a review of the Riximyo (rituximab) Product  
6 Monograph by Sandoz Canada Incorporated; its Regulatory Decision Summary and Summary Basis of  
7 Decision from Health Canada; the Highlights of Prescribing Information for RITUXAN (rituximab) by  
8 Biogen and Genentech; its Investigator’s Brochure, issued by Roche; its Biologics License Application;  
9 its FDA approval history; and the Medicare Coverage Database for off-label use of rituximab and  
10 rituximab biosimilars. Based on collected information, the methodology was broken down into four main  
11 sections: 1- establishing eligibility criteria, 2- search strategy and selection process in identifying  
12 (auto)immune diseases and rituximab use, 3- data collection process for defining key players in  
13 (auto)immunity, and 4- synthesis methods in categorizing disorders and depicting patent expiration  
14 (Table 1).

15

### 16 **Eligibility criteria**

17 As approved (on-label) indications can vary from one regulatory body to the next, we defined off-label  
18 use according to Health Canada’s approval guidelines. Research articles published worldwide in any  
19 language or year were identified to recognize the extent of documented rituximab use. No limitations  
20 were imposed on the type or level of evidence gathered, which included anecdotal, observational, and  
21 experimental use. Any reported clinical benefit of rituximab in a given medical condition was included,  
22 regardless of study criteria, outcomes, or significance. If a particular autoimmune or immune-mediated  
23 disease was characterized by many complications and rituximab seemed to improve at least one of its  
24 manifestation, the study was included. We called this data set “perceived benefit” to encompass all lines  
25 of evidence, avoiding excluding any indication where rituximab biosimilars could be useful. Because  
26 there is much overlap and interchangeability in the literature between autoimmune and immune-mediated  
27 diseases, both were included in the analysis. Every condition identified whether entirely or partly  
28 autoimmune/immune-mediated was included, regardless of its cause or etiology. Autoinflammatory  
29 disorders were excluded. As our focus was the repurposing of rituximab from its approved use in  
30 hematologic cancers to off-label use in B cell-mediated autoimmune diseases, we excluded the discipline  
31 of oncology. Animal models and other experimental disease models were also excluded.

1 We included reports on adults worldwide, but only those without concomitant diseases. Studies  
2 involving children were not included unless a given disease arose in childhood and continued into  
3 adulthood. In all reports, rituximab was used as a single agent or as an add-on to an ongoing drug regimen  
4 that could not be terminated or replaced. The sole exceptions to this criterion were the use of  
5 premedication typically given prior to rituximab infusion to avoid or mitigate infusion-related reactions,  
6 and the use of concomitant drugs taken as part of an ongoing drug regimen where rituximab was added  
7 for further benefit or to taper or wean off current medication.

8

### 9 **Search strategy and selection process in identifying (auto)immune diseases and rituximab use**

10 To gather a list of autoimmune and immune-mediated diseases, we consulted the Autoimmune Registry  
11 Inc., the Genetic and Rare Diseases Information Center Website (a program of the National Institutes of  
12 Health), and the National Organization for Rare Disorders' Rare Disease Database. The PubMed  
13 database was searched using the keywords "autoimmune disease," "immune-mediated disease,"  
14 "autoimmunity," or "immunity," and "Riximyo," "Rituxan," "rituximab," "rituximab mechanism of  
15 action," or "pathophysiology." All diseases identified were also included as keywords in the PubMed  
16 search, followed by "pathophysiology" to confirm the involvement of (auto)immunity, and separately  
17 with "rituximab" to identify its use therein. If a PubMed search failed to provide information, Google  
18 Scholar was searched using the same keywords to locate scientific and medical peer-reviewed journals.  
19 If no results were posted anywhere, the Clinicaltrials.gov website was consulted to identify ongoing or  
20 recently completed trials involving rituximab to determine its use in a particular autoimmune or immune-  
21 mediated disease. We categorized the following two scenarios as "no perceived clinical benefit": when  
22 studies or results on rituximab use/efficacy were pending, or when rituximab was used but follow-up or  
23 outcomes regarding its use were not reported. Overall, 1,530 articles met the established criteria, resulting  
24 in an extensive list of indications where rituximab has been or could be used (Supplementary Tables 1–  
25 17).

26

### 27 **Data collection process for defining key players in (auto)immunity**

28 Key immune cells or proteins were identified for every autoimmune and immune-mediated disease. We  
29 focused on B cell-mediated autoimmunity through (auto)antibodies, (self-)antigens, T lymphocytes, and  
30 inflammatory cytokines. If the articles initially gathered regarding disease pathophysiology did not  
31 specify the key players, we searched PubMed for additional information by combining the name of the  
32 disease with the following keywords: "B cells," "B lymphocytes," "B cell dysregulation," "autoreactive

1 B cells,” “autoreactive B lymphocytes,” “antibodies,” “autoantibodies,” “antigens,” “autoantigens,”  
2 “self-antigens,” “T cells,” “T lymphocytes,” “T cell involvement,” “autoreactive T cells,” “autoreactive  
3 T lymphocytes,” “cytokines,” “inflammatory cytokines,” “cytokine network,” and “cytokine imbalance”  
4 – the latter included either an increase in pro-inflammatory or a decrease in anti-inflammatory cytokines.

### 5 **Synthesis methods in categorizing disorders and depicting patent expiration**

6 Where applicable, the Merck (MSD) Manuals (both the professional and consumer editions) were used  
7 to standardize and categorize the autoimmune and immune-mediated diseases identified. All potential  
8 off-label indications found were grouped by medical discipline. If a given disease or disorder did not  
9 appear in either of the Merck Manual searches, previously recorded data on the affected tissues or organ  
10 systems were used to classify it into the appropriate category.

11 To depict the impact of time and patent expiration on rituximab repurposing, the cumulative  
12 number of referenced articles in the current review was plotted relative to the year of publication. Using  
13 the 17 supplementary figures as a database encompassing 1,530 publications, articles from every medical  
14 specialty were included if they demonstrated a clinical benefit following rituximab treatment.

15



## 1 **Results**

2  
3 We identified 213 clinical indications that could benefit from off-label use of rituximab biosimilars  
4 across 17 medical specialties (rheumatology, neurology, dermatology, endocrinology, hematology,  
5 ophthalmology, gastroenterology, nephrology, immunology, cardiology, psychiatry, gynecology,  
6 pulmonology, hepatology, otolaryngology, urology, and infectiology). In the following sections, we  
7 describe in detail how rituximab has been used in these specialties, which are listed in descending order  
8 based on the number of B cell-mediated diseases identified. For each specialty, a table was generated to  
9 summarize the involvement of (auto)antibodies, (self-)antigens, T cells, and cytokines in the  
10 pathophysiology of all the selected clinical indications (Supplementary Tables 1–17). Moreover, the last  
11 column of each table indicates whether there are documented clinical benefits of using rituximab for each  
12 indication. The absence of clinical benefit was often due to the lack of rituximab repurposing for a given  
13 indication.

### 14 15 **Rheumatology**

16 Rituximab repurposing began in 1999, after a case report describing clinical remission of RA in a patient  
17 with non-Hodgkin lymphoma treated with rituximab.<sup>31</sup> Rituximab was approved as an RA treatment in  
18 2006.<sup>32</sup> Interestingly, we discovered that rituximab use has expanded to > 40 musculoskeletal and  
19 connective tissue disorders in rheumatology. These encompass joint and bursa, bone, and muscle and  
20 tendon disorders; autoimmune rheumatic disorders; vasculitides; and immunoglobulin G4-related  
21 disease (Supplementary Table 1). Mechanistically, B cells are crucial for tissue destruction across these  
22 indications, causing immune cells to infiltrate and accumulate in the synovium, juxta-articular regions,  
23 exocrine glands, and muscles, bones, and/or blood vessels, where they amplify immune and  
24 inflammatory responses. In addition to their local presence, these immune cells also end up in the  
25 systemic circulation, contributing to continuous immune activation and maintaining chronic disease. This  
26 translates into symptomatic manifestations and the perpetuation or worsening of the condition.

27 B cells play crucial roles in RA pathophysiology.<sup>33-38</sup> They produce autoantibodies (rheumatoid  
28 factors and antibodies against citrullinated and carbamylated proteins) that bind self-antigens,  
29 contributing to immune complex formation and complement activation in and around the joints. These  
30 antibodies also activate T cells, which synthesize proinflammatory cytokines, promoting leukocyte  
31 infiltration of the joints, ectopic lymphoid center formation, angiogenesis, and synovial hyperplasia.<sup>39</sup>  
32 Rituximab treatment dampens RA autoimmunity by depleting the source of these reactive autoantibodies.

1 Depleting B cells with rituximab diminished clinical symptoms by decreasing autoantibody  
2 concentrations, reducing proinflammatory cytokine levels, and lessening neutrophil extracellular trap  
3 release, which plays a role in autoantigen generation. This vicious cycle is at the core of autoimmune  
4 diseases, and rituximab's ability to break it has extended its use to other indications in rheumatology.<sup>40</sup>  
5 Although CD20<sup>+</sup> B cell depletion varies among patients and may not necessarily be complete, the  
6 response to therapy has been positive across musculoskeletal and connective tissue disorders. Rituximab  
7 has yielded clinical benefits in 65% (26/40) of the identified autoimmune and immune-mediated diseases  
8 in rheumatology for which a rationale for its off-label use exists (Supplementary Table 1). Symptoms of  
9 inflammation are particularly alleviated;—patients feel less pain and body aches, experience less  
10 swelling, and ultimately suffer less structural joint and bone damage. This improvement in symptoms  
11 increases quality of life, with improved mobility and functional capacity (FIG. 2).

12

### 13 **Neurology**

14 We identified 40 neurologic disorders using our research criteria, including demyelinating disorders;  
15 multiple sclerosis; autoimmune encephalitis; peripheral nervous system disorders (such as neuritis,  
16 neuropathies, as well as muscle cramps, spasms, twitches, jerks, and involuntary movements); motor unit  
17 disorders and motor neuron diseases; neuromuscular junction disorders and disorders of neuromuscular  
18 transmission; autonomic nervous system disorders or autoimmune dysautonomia; sleep and wakefulness  
19 disorders; periodic limb movement disorders; movement and cerebellar disorders; central nervous system  
20 or brain and spinal cord disorders; pain; headaches and headache disorders such as migraines; delirium  
21 and dementia; tic disorders; and seizure disorders and autoimmune-related epilepsies (Supplementary  
22 Table 2). The notion that B cells could be involved in the pathophysiology of these neurologic disorders  
23 stemmed from the detection of antibodies in the cerebral spinal fluid (CSF) and/or at sites of injury of  
24 affected patients.<sup>41</sup> Additional studies are needed to better understand the mechanistic involvement of B  
25 cells in the pathology of these indications. B cells secrete autoantibodies (from clonally expanded plasma  
26 cells in the CSF) and inflammatory cytokines, and act as autoimmune APCs. In addition to acting locally,  
27 they contribute to pathology from the periphery, causing and perpetuating disease symptoms. Although  
28 the symptoms associated with various neurological conditions are extremely heterogeneous, they all  
29 involve B cells entering, accumulating, and persisting in the central nervous system or its barriers.<sup>41</sup> As  
30 such, halting disease progression requires eliminating these lymphocytes.

31 The most common neurological indication for rituximab repurposing is multiple sclerosis (MS),  
32 the most frequently occurring neuroimmunological disorder in young adults.<sup>42-54</sup> Rituximab was the first

1 anti-CD20 therapy used in MS, and is commonly prescribed off-label to treat different types of the  
2 condition.<sup>55</sup> Depleting B cells with rituximab profoundly reduces clinical disease and signs of  
3 inflammation, as detected by magnetic resonance imaging scans. Patients experience less frequent  
4 relapses; benefit from a delayed disease progression; avoid the onset of certain expected symptoms  
5 altogether; and develop less gadolinium-enhancing lesions than untreated patients. This improves their  
6 quality of life, allowing them to independently perform their daily activities. Although these reported  
7 benefits are specific to MS, the same logic applies to the other identified neurological indications. To  
8 date, rituximab therapy has benefited 50% (20/40) of all autoimmune and immune-mediated diseases  
9 identified as neurological (Supplementary Table 2).

10

## 11 **Dermatology**

12 We identified 23 dermatological disorders associated with B cell dysfunction (Supplementary Table 3).  
13 These include bullous diseases or intraepithelial autoimmune blistering dermatoses; psoriasis and scaling  
14 diseases; hypersensitivity and reactive skin disorders (dermatitis, dermatosis, hives or urticaria, and  
15 panniculitis); acne and related disorders, including autoinflammatory keratinization diseases;  
16 pigmentation disorders; and hair loss. The evolving understanding of these dermatological conditions  
17 has shifted the focus of recent studies to their underlying immune mechanisms.<sup>56</sup> Many are mediated by  
18 B cells and their diverse functions, specifically autoantibody production (IgG or IgA), cytokine secretion,  
19 antigen presentation, and co-stimulatory effects.<sup>56</sup> The most common symptoms include erythema,  
20 pruritus, hypo- or hyperpigmentation, xerosis or xeroderma, and fluid-filled pustules or blisters.<sup>57</sup>

21 In dermatology, the most well-known and successfully treated disorder with rituximab is PV, a  
22 chronic autoimmune disease characterized by the production of antibodies against desmogleins, a family  
23 of cellular adhesion proteins.<sup>58-65</sup> Autoantibody-induced loss of adhesion between keratinocytes causes  
24 blisters and widespread erosions.<sup>56</sup> Rituximab depletes these B cells, decreasing anti-desmoglein  
25 autoantibodies and desmoglein-specific T cells.<sup>66</sup> Rituximab is effective in treating both untreated and  
26 previously treated moderate-to-severe PV. The treatment is well tolerated and significantly more  
27 effective at inducing prolonged remission than conventional therapy, without the side effects linked with  
28 steroid use. In case of relapse, repeated rituximab treatment is usually successful and is more effective  
29 when administered early in the disease course. Further studies may highlight the need for additional  
30 cycles of rituximab to maintain remission and establish the ideal dosage regimen.<sup>58</sup> Coined a magic bullet  
31 for PV, rituximab is now approved for its treatment by the FDA but is still prescribed off-label in Canada.

1 Beyond PV, clinical and/or laboratory improvements have been observed in 65% (15/23) of  
2 identified autoimmune and immune-mediated dermatological disorders for which there is a rationale for  
3 off-label rituximab use (Supplementary Table 3). Treated patients experience a prolonged clinical  
4 remission, typically correlating with sharp decreases in lymphocytes and antibody titers. Rituximab  
5 provides relief against skin itchiness, redness, swelling, dryness, and/or eruptions, as measured by visual  
6 analog scales and disease severity indexes.

## 7

### 8 **Endocrinology**

9 Our criteria identified 20 endocrine and metabolic disorders characterized by the aberrant involvement  
10 of B cells, resulting in the secretion of pathogenic IgG antibodies that attack components of the  
11 hypothalamic-pituitary-adrenal axis and related glands (Supplementary Table 4). These included  
12 polyglandular deficiency syndromes, adrenal disorders, and adrenalitis, including different types of  
13 adrenal insufficiencies; thyroid disorders and thyroiditis; parathyroid disorders and parathyroiditis;  
14 pituitary disorders and multiple variants of hypophysitis; diabetes mellitus and other insulin syndromes  
15 and autoimmune forms of hypoglycemia; dyslipidemia; and protein aggregation and deposition.

16 Graves' disease (GD) is a common endocrine disorder with multiple associated complications. It  
17 is a thyroid autoimmune disorder in which stimulatory anti-thyrotropin receptor autoantibodies (TRAb)  
18 produced by reactive B cells induce hyperthyroidism.<sup>67-76</sup> Patients suffering from GD are also affected  
19 by Graves' orbitopathy (GO), its main extra-thyroidal manifestation. GO is characterized by the  
20 inflammation and remodeling of orbital tissues in response to antibody attacks and dysregulated cytokine  
21 expression, including chemoattractants.<sup>77</sup> GO responds effectively to rituximab when used early in the  
22 disease course.<sup>67</sup> Rituximab relieves the disease symptoms relatively quickly, exerting its clinical effects  
23 only a few weeks after the first infusion.<sup>67</sup> Treated patients have decreased clinical activity scores (an  
24 index of disease severity) and relief from proptosis and diplopia, and increased quality of life. These  
25 effects are likely due to significantly reduced serum TRAb levels and decreased peripheral B cells.<sup>67</sup>

26 To date, 45% (9/20) of all autoimmune and immune-mediated diseases identified in  
27 endocrinology that have a rationale for off-label rituximab therapy have benefited from its use  
28 (Supplementary Table 4).

### 29

### 30 **Hematology**

31 Based on our search criteria, we identified 15 B cell-mediated clinical indications in hematology  
32 (Supplementary Table 5). Several types of cytopenias fall under this category, affecting red blood cells

1 (erythroid precursors and erythrocytes), white blood cells (neutrophils and lymphocytes), and/or platelets  
2 (thrombocytes), as well as hemolytic anemias, anemias caused by deficient or decreased erythropoiesis,  
3 leukopenias (such as neutropenia and lymphocytopenia), thrombocytopenias and platelet dysfunction,  
4 coagulation and thrombotic disorders, lymph node affections, and plasma cell disorders.

5 The aberrant involvement of B cells in hematological diseases seems more intuitive than in other  
6 medical disciplines, as B cells are a main component of blood. B cells can produce autoantibodies against  
7 various blood constituents, from precursors to mature blood cells, causing a heterogeneous group of  
8 conditions called autoimmune cytopenias, which can be treated with rituximab.<sup>78-93</sup> In addition, immune  
9 thrombocytopenic purpura (ITP) is mediated by platelet or thrombocyte autoantibodies.<sup>94-101</sup> These  
10 autoantibodies often target the two most prevalent receptors on the platelet surface (the GPIb/IX complex  
11 (von Willebrand factor receptor) and the GPIIb/IIIa receptor (collagen/fibrinogen receptor), reducing the  
12 ability of the platelets to aggregate.<sup>93</sup> As a result, patients present with variable degrees of mucocutaneous  
13 bleeding. Rituximab has been widely used off-label to treat ITP as it raises platelet count by inhibiting  
14 their destruction. In doing so, it decreases symptoms such as petechiae, purpura, hematomas, gum and  
15 nose bleeding, blood in urine or stools, as well as extreme tiredness.<sup>102</sup> Furthermore, the administration  
16 of rituximab early in the disease course has also showed to improve relapse-free survival.<sup>103</sup> We found  
17 that 87% (13/15) of autoimmune and immune-mediated hematological conditions with a rationale for  
18 off-label rituximab use benefited from the therapy (Supplementary Table 5).

19

## 20 **Ophthalmology**

21 Our analysis identified 13 eye disorders linked to B cells (Supplementary Table 6). These comprised  
22 several forms of autoimmune uveitis and related disorders; corneal disorders; conjunctival and scleral  
23 disorders; retinal and optic nerve disorders; glaucoma; idiopathic orbital inflammation; and lacrimal and  
24 orbital diseases. Although how B cells are involved in these disorders is not entirely understood, they are  
25 instrumental for autoimmune tissue destruction in and around the eye. In addition to secreting  
26 autoantibodies that directly induce cell lysis and are involved in antigen-antibody immune complex  
27 deposition into the ocular tissue, B cells promote intraocular inflammation by presenting antigens to T  
28 cells, producing many inflammatory cytokines, and supporting T cell survival.<sup>104,105</sup> Patients with active  
29 eye inflammation have significantly more infiltrating B cells in their ocular tissues and higher levels of  
30 B cell-associated cytokines in their aqueous humors than healthy controls.

31 Uveitis, a diverse group of intraocular inflammatory diseases, is the autoimmune eye disorder  
32 most commonly treated with rituximab.<sup>105</sup> It produces a positive therapeutic response by depleting the

1 CD20<sup>+</sup> B cells that attack various segments of the eye, including disease improvement and remission,  
2 which translates into improved visual acuity.<sup>104,106-120</sup>

3 Off-label rituximab has produced clinical benefits in 62% (8/13) of all B cell-mediated  
4 autoimmune and immune-mediated eye diseases (Supplementary Table 6), improving the vision of  
5 patients suffering from all ophthalmological disorders tested. Based on the success of rituximab against  
6 GO, it may be interesting to induce B cell depletion with rituximab shortly after diagnosis instead of  
7 reserving it as a second-line therapy.<sup>74</sup>

8

## 9 **Gastroenterology**

10 Nine B cell-mediated gastrointestinal (GI) disorders were identified, including swallowing disorders,  
11 multiple affections of GI tract components and accessory digestive organs (*i.e.*, esophagitis, pancreatitis,  
12 gastritis, enteropathies, and polyposis), and many forms of colitis or inflammatory bowel disease (IBD),  
13 which affect the intestines and rectum (Supplementary Table 7).

14 In contrast to other categories covered thus far, rituximab use in gastroenterology is limited.  
15 Rituximab administered for non-GI indications can induce GI disorders. Recent reports have linked  
16 rituximab with the development of *de novo* colitis, a type of IBD. Other reported rituximab-associated  
17 GI toxicities include diarrhea and bowel perforation.<sup>121</sup> These side effects could result from the infusion  
18 itself, suggesting that using rituximab therapy for GI disorders should be approached with caution.  
19 Nonetheless, B cells are heavily involved in the pathophysiology of these diseases. B cells produce IgG  
20 in the gut, which contributes to intestinal inflammation in IBD.<sup>122,123</sup> One of the few GI disorders for  
21 which rituximab showed a favorable response, including safety and efficacy, is autoimmune  
22 pancreatitis.<sup>124-132</sup> Patients afflicted with this disease experience remission, and consequently, relief from  
23 severe abdominal pain after rituximab treatment. Overall, rituximab provided clinical benefit in 22%  
24 (2/9) of the identified autoimmune and immune-mediated GI diseases whose pathophysiologies indicate  
25 a rationale for its repurposing (Supplementary Table 7).

26

## 27 **Nephrology**

28 We identified seven B cell-mediated kidney disorders, including multiple glomerular disorders  
29 (nephritides, nephropathies, glomerulopathies, and podocytopathies) and tubulointerstitial diseases  
30 (Supplementary Table 8). In contrast to gastroenterology, where rituximab use is limited, its repurposing  
31 in nephrology is very promising as 86% (6/7) of the identified indications showed a favorable response  
32 to off-label therapy (Supplementary Table 8). Accordingly, rituximab use in nephrology is



1 increasing.<sup>133,134</sup> B cell clonal expansion has been observed in the blood and/or renal tissue of patients  
2 with glomerulonephritis, which rituximab targets.<sup>135-140</sup> Glomerulonephritis (*i.e.*, inflammation of the  
3 glomeruli) is characterized by pathogenic fibril deposition within damaged kidney components as a  
4 consequence of autoimmune processes governed by B cells.<sup>141</sup> Rituximab-mediated B cell depletion  
5 alleviates many disease symptoms, including proteinuria. Importantly, kidney function is preserved and  
6 even improved after treatment is completed.<sup>137,142-146</sup>

## 8 **Immunology**

9 Seven B cell-mediated immune and allergic disorders were identified (Supplementary Table 9). These  
10 include immunodeficiency disorders or primary immune deficiency diseases, inborn errors of immunity,  
11 transplantation complications, allergic and atopic disorders, and other immune hypersensitivity  
12 disorders. As in hematology, B cell involvement in immunologic disorders seems quite intuitive, as they  
13 are essential for the adaptive immune response, humoral immunity, and antibody production. The  
14 activation of autoreactive B cells drives the pathogenic processes of autoimmune diseases.<sup>147</sup> Therefore,  
15 B cell targeting has become an effective treatment modality for immune and allergic disorders.<sup>148</sup> In  
16 particular, rituximab is a key medication used in antibody-mediated rejection (AMR), a common and  
17 potentially devastating sequela of allograft rejection associated with graft loss after transplantation. AMR  
18 is a leading cause of morbidity and mortality following transplant surgery.<sup>149</sup> In AMR, B cells from the  
19 donor produce antibodies against antigens expressed on recipient organ cells.<sup>150-160</sup> Rituximab  
20 administration before transplantation, with or without follow-up maintenance doses, improved AMR and  
21 graft survival rates in patients undergoing kidney transplantation.<sup>161</sup> Similarly, rituximab may also  
22 improve clinical responses and quality of life in patients who develop steroid-refractory chronic graft-  
23 versus-host disease after allogeneic stem cell transplantation.<sup>162-166</sup> Of the identified autoimmune and  
24 immune-mediated diseases for which rituximab was used off-label, 86% (6/7) of them have benefited  
25 from rituximab therapy (Supplementary Table 9).

26

## 27 **Cardiology**

28 We identified seven cardiovascular disorders characterized by the inflammation of various cardiac tissues  
29 (myocarditis, pericarditis, endocarditis, arteriosclerosis, peripheral arterial disorders, and diseases of the  
30 aorta plus its branches; Supplementary Table 10). As rituximab infusion is associated with adverse  
31 cardiac side effects (including hypotension, hypoxia, myocardial infarction, arrhythmias, cardiogenic  
32 shock, and dilated cardiomyopathy), its use in cardiology may seem counterintuitive. However,

1 considering the marked involvement of B cells in cardiac disease pathophysiology, rituximab therapy  
2 can be beneficial, especially for patients with heart failure.<sup>167</sup> Heart-reactive autoantibodies in the sera of  
3 affected patients interfere with cardiomyocyte function by targeting diverse antigens, including  $\alpha$ - and  
4  $\beta$ -myosin heavy-chain isoforms, sarcolemma proteins, mitochondrial enzymes, and beta-adrenergic and  
5 muscarinic receptors.<sup>168-170</sup> B cells also activate fibroblasts and a variety of immune cells (T cells,  
6 neutrophils, macrophages). Altogether, these activated cells promote the development of cardiac  
7 hypertrophy, inflammation, maladaptive tissue remodeling, and fibrosis, which ultimately lead to heart  
8 failure. Because of their active involvement in the disease, rituximab has been used to target B cells,  
9 leading to improved left ventricular ejection fractions<sup>167,171</sup> and better overall quality of life for patients  
10 with autoimmune and immune-mediated cardiovascular diseases. We found that 57% (4/7) of these  
11 indications have benefited from rituximab repurposing (Supplementary Table 10).<sup>168,170,172-183</sup>

12

### 13 **Pulmonology**

14 We identified five pulmonary disorders mediated by B cell, including idiopathic pulmonary fibrosis  
15 (IPF), non-IPF interstitial lung diseases (ILDs), asthma and related disorders, diffuse alveolar or  
16 pulmonary hemorrhage, and sarcoidosis, 60% (3/5) of which have benefited from rituximab repurposing  
17 (Supplementary Table 11). ILDs are a group of heterogeneous disorders characterized by lung  
18 inflammation and scarring, with alveolar septal thickening, fibroblast proliferation, collagen deposition,  
19 and ultimately pulmonary fibrosis. ILDs with no clear etiology are typically autoimmune or immune-  
20 mediated and are termed “idiopathic interstitial pneumonias.” Affected patients suffer from cough,  
21 dyspnea, and shortness of breath due to the abnormal accumulation of inflammatory blood cells. White  
22 blood cells (B cells and macrophages) and fluid accumulate in the lung tissue, which cause and perpetuate  
23 inflammation.<sup>184-191</sup> If left untreated, scar tissue replaces healthy lung tissue and the alveoli are  
24 progressively destroyed, ultimately leading to pulmonary fibrosis. Various degrees of B cell infiltration  
25 occur in different forms of ILD.<sup>192</sup> By eliminating B cells, rituximab improves both IPF and non-IPF  
26 ILD, improving patients’ pulmonary function and quality of life.<sup>188,193-198</sup>

27

### 28 **Hepatology**

29 We identified four B cell-mediated hepatic and biliary disorders, including autoimmune hepatitis (AIH)  
30 different stages of liver scarring such as fibrosis and cirrhosis, and gallbladder and bile duct disorders  
31 including cholangitis (Supplementary Table 12). B cells are integral to autoimmune liver pathogenesis,<sup>199</sup>  
32 promoting autoimmunity by presenting antigens to T cells, producing autoantibodies, and generating



1 inflammatory cytokines.<sup>200-205</sup> AIH is clinically characterized by the presence of antibodies against liver  
2 autoantigens, hypergammaglobulinemia, and a lymphoplasmocytic infiltrate with interface activity (by  
3 liver histology).<sup>199</sup> AIH can result in hepatic fibrosis, progress to cirrhosis, and eventually require liver  
4 transplantation. Rituximab is effective against AIH, causing sustained improvements in serum liver  
5 enzymes and an absence of clinical disease in the first few years after therapy.<sup>201,206,207</sup> Rituximab  
6 treatment also helps reduce the burden of corticosteroid use and associated side effects.<sup>207</sup> As such,  
7 patients experience a better quality of life, and can delay or completely avoid liver transplantation.  
8 However, the use of rituximab in hepatology should be approached with caution, as several studies have  
9 reported liver toxicity or liver failure secondary to reactivation of hepatitis B following rituximab  
10 infusion (also known as “rituximab-induced autoimmune hepatitis”). Although rituximab may not  
11 replace the current standard of care, it could prove useful in specific cases by controlling disease flare-  
12 ups.<sup>208</sup> Among all the identified autoimmune and immune-mediated hepatic diseases that could be  
13 treated with off-label rituximab, 50% (2/4) responded favorably (Supplementary Table 12).

14

## 15 **Other disciplines**

16 Finally, we collated data on five other medical disciplines with single or no indications shown to benefit  
17 from rituximab therapy: psychiatry, gynecology, otolaryngology, urology, and infectiology  
18 (Supplementary Tables 13–17). Nevertheless, B cells are crucial for the self-tissue damage at the heart  
19 of their pathophysiologies, through the same mechanisms described for other specialties (FIG. 2).  
20 However, despite a rationale for repurposing rituximab to improve their clinical symptoms, rituximab  
21 use has not been reported for many of these B cell-driven indications, with the exception of pemphigoid  
22 gestationis<sup>209-215</sup> (gynecology) and autoimmune inner ear disease<sup>216-219</sup> (otolaryngology). Therefore,  
23 these lists of autoimmune diseases contain promising candidates for future rituximab repurposing.

24

## 25 **Repurposing trends over time**

26 Lastly, we examined rituximab repurposing over time, relying on our curated database of 1,530  
27 references (Supplementary Tables 1–17). As a metric of its repurposing in patients, we calculated annual  
28 cumulative numbers of referenced articles per medical specialty. Of the 17 medical specialties studied,  
29 13 showed favorable clinical responses to rituximab (FIG. 3). Interestingly, rituximab repurposing  
30 accelerated approximately 10 years after its regulatory approval for hematological malignancies.  
31 Rheumatology and neurology had the highest repurposing rates, followed by dermatology. Moreover,  
32 rituximab repurposing tended to increase around 2018, when its US patent expired, suggesting that access

- 1 to less expensive biosimilars may stimulate its repurposing for a vast number of indications, including
- 2 rare or orphan diseases.

## 1 Discussion

2  
3 Our comprehensive analysis of 213 autoimmune and immune-mediated diseases showed that rituximab  
4 has been extensively prescribed off-label therein, producing documented clinical benefit in 116  
5 indications across 17 medical specialties. As B cells play central roles in a myriad of autoimmune  
6 diseases, we also highlighted the repurposing potential of rituximab in naïve indications or in those where  
7 further testing is required to obtain results of therapeutic outcome. Figure 4 shows the impressive number  
8 of indications demonstrating a clinical benefit alongside a number of potential indications for rituximab  
9 use in B cell-mediated diseases. Altogether, our work underlines the promise of rituximab repurposing,  
10 due to its impacts on CD20<sup>+</sup> B cell-mediated autoimmune diseases addressing in some cases urgent  
11 unmet clinical needs, particularly in cases that are refractory or intolerant to current standards of care.

12 Although the underlying pathophysiologies of the autoimmune diseases for which rituximab has  
13 been repurposed are not fully elucidated or necessarily similar, B cells are their common link. The  
14 pathological cascade follows a comparable sequence, *i.e.*, loss of self-tolerance causes B cells to produce  
15 autoantibodies, present antigens, and activate T lymphocytes, which in turn secrete inflammatory  
16 cytokines that contribute to disease.<sup>11</sup> As such, eliminating CD20<sup>+</sup> B cells restores immune tolerance and  
17 rewires the immune system such that self-proteins are no longer perceived as foreign.<sup>220</sup> As this review  
18 demonstrates, rituximab could be repurposed for numerous autoimmune and immune-mediated diseases  
19 across various medical specialties.<sup>32</sup>

20 Given the high failure rate in developing new medicines, repurposing drugs to treat diseases with  
21 similar molecular mechanisms is extremely attractive, de-risking the drug development path by lowering  
22 global costs and shortening the development time. The cost to develop a new molecular compound can  
23 reach 2–3 billion USD, while drug repurposing is significantly less expensive, with an estimated average  
24 of 300 million USD. The case for biologic repurposing is even more interesting, as their costs and  
25 development times are generally even longer than those for small molecules.<sup>13</sup> In the history of medicine,  
26 drug repurposing has mainly occurred by serendipity, with a small molecule typically repurposed for a  
27 single indication or, at best, a couple of indications. The greatest advantage of rituximab repurposing is  
28 its applicability to more than 100 different indications. In addition to its approved uses (hematological  
29 malignancies, RA, granulomatosis with polyangiitis, and microscopic polyangiitis), a significant portion  
30 of sales of rituximab biosimilars is off-label. Rituximab's patent expiration at the end of the 1990s may  
31 have prompted pharmaceutical companies to refrain from investing in novel clinical trials, particularly  
32 for rare diseases. However, the success of its repurposing has also stimulated the industry of biosimilars.

1 As with any biologic product, research and development costs are steep, making rituximab difficult to  
2 afford without proper health insurance. Fortunately, since its patent expiration, rituximab biosimilars  
3 such as Riximyo have made treatment more affordable and accessible.

4 Once a drug has demonstrated either off-target effects or a newly identified on-target effect (as  
5 in the case of rituximab), it may be prescribed as an off-label treatment or tested in clinical trials to  
6 expand its approved range of indications. Physicians are allowed to use their knowledge, the scientific  
7 literature, and even anecdotal case reports to prescribe drugs that may relieve patient symptoms.<sup>221</sup>  
8 Importantly, in the context of rare diseases, which are often neglected by pharmaceutical industries due  
9 to the low chance of a return on the investment, drug repurposing is an appealing solution. Off-label use  
10 avoids the need to obtain regulatory approval through clinical trials, which is not practical for small  
11 patient populations. Rituximab is often repurposed for B cell-mediated diseases because, in many cases,  
12 the approved treatments are ineffective. However, although many studies and case reports support  
13 rituximab repurposing for a wide range of clinical indications, the concern, which may limit its  
14 repurposing, may be associated with the treatment-induced adverse effects for a drug without official  
15 approval.

16 B cells are at the core of immunity and depleting them comes with a cost; therefore, it is important  
17 to evaluate the risks and benefits of rituximab therapy on a case-by-case basis. The immunosuppression  
18 caused by rituximab is a double-edged sword: it beneficially wipes out autoreactive B cells but depletes  
19 important blood cells, thereby inducing side effects that can require medical attention.  
20 Immunosuppression makes patients prone to infections, and they must be closely monitored during and  
21 after treatment. The depletion of circulating B cells after rituximab administration is rapid (within 1  
22 week) and profound, with peripheral blood B cell counts remaining low for at least 6–12 months  
23 following therapy. The repopulating pool is dominated by immature B cells, while memory B cell  
24 recovery is slow and occurs after 2 years.<sup>222,223</sup>

25 Overall, this review gathered the documented clinical benefits of rituximab repurposing and well-  
26 established data regarding disease pathophysiology, providing a scientific rationale for using rituximab  
27 to treat autoimmune and immune-mediated disorders across different medical disciplines. Although  
28 many of the cited studies highlight the therapeutic benefits of rituximab in indications other than those  
29 originally approved, these small case reports and small-scale clinical studies did not reach the stage of  
30 randomized clinical trials. Therefore, even though these studies support the clinical benefits of rituximab  
31 repurposing, further studies are warranted to obtain a better understanding of its efficacy and safety across  
32 different indications—in larger patient cohorts, when possible. The economic burden of this biological

1 therapy likely also contributes to the limited number of clinical studies. Ultimately, the decision to  
2 repurpose a drug depends on shared knowledge and available clinical observations, the personal  
3 experience of the treating physician, and the patient’s willingness to try a medication off-label.

4

## 5 **Conclusion**

6

7 In summary, rituximab treatment appeared to be beneficial in 54% (116/213) of autoimmune and  
8 immune-mediated diseases identified across all 17 medical specialties. This finding highlights the need  
9 for future studies on the remaining rituximab-naïve indications that could potentially benefit from this  
10 therapy. In addition, for the 116 diseases that have already benefited from rituximab repurposing, larger  
11 studies are needed to confirm its efficacy or establish its long-term safety, in addition to establishing the  
12 optimal drug regimens for each specific indication. If the trend of rituximab repurposing continues to  
13 grow (FIG. 3), the combination of more scientific knowledge on B cell involvement in immune disease  
14 and a cost reduction of biosimilars will stimulate off-label use in the future.

15 Several well-known drugs have been successfully repurposed for 1–2 additional indications,  
16 including sildenafil, thalidomide, and celecoxib.<sup>32</sup> Rituximab’s number of indications (116) and global  
17 sales (in the billions) greatly exceed those of other repurposed drugs.<sup>32</sup> Therefore, rituximab is the most  
18 exemplary case of the value of drug repurposing since the concept emerged in the early 2000s.<sup>224</sup> This  
19 review serves as a reference database that provides a rationale for using rituximab to treat patients  
20 afflicted with B cell-mediated diseases.

21

22

1 **Acknowledgements**

- 2 N.J.-M.R. holds a Junior 2 Research Scholar award from the Fonds de Recherche du Québec en Santé.

## 1 REFERENCES

- 2  
3  
4 1 Grillo-López, A. J. *et al.* Overview of the clinical development of rituximab: first monoclonal  
5 antibody approved for the treatment of lymphoma. *Semin Oncol* **26**, 66-73 (1999).  
6 2 Barnas, J. L., Looney, R. J. & Anolik, J. H. B cell targeted therapies in autoimmune disease. *Curr*  
7 *Opin Immunol* **61**, 92-99, doi:10.1016/j.coi.2019.09.004 (2019).  
8 3 RIXIMYO® (Rituximab for Injection, Intravenous Infusion, 10 mg/mL). Submission Control  
9 No: 259381. *Product Monograph, Sandoz Canada Inc.*, 122 (2022).  
10 4 Randall, K. L. Rituximab in autoimmune diseases. *Aust Prescr* **39**, 131-134,  
11 doi:10.18773/austprescr.2016.053 (2016).  
12 5 Meyer, S. *et al.* New insights in Type I and II CD20 antibody mechanisms-of-action with a panel  
13 of novel CD20 antibodies. *Br J Haematol* **180**, 808-820, doi:10.1111/bjh.15132 (2018).  
14 6 Marshall, M. J. E., Stopforth, R. J. & Cragg, M. S. Therapeutic Antibodies: What Have We Learnt  
15 from Targeting CD20 and Where Are We Going? *Front Immunol* **8**, 1245,  
16 doi:10.3389/fimmu.2017.01245 (2017).  
17 7 Pavlasova, G. & Mraz, M. The regulation and function of CD20: an "enigma" of B-cell biology  
18 and targeted therapy. *Haematologica* **105**, 1494-1506, doi:10.3324/haematol.2019.243543  
19 (2020).  
20 8 Li, J. *et al.* The Coordination Between B Cell Receptor Signaling and the Actin Cytoskeleton  
21 During B Cell Activation. *Front Immunol* **9**, 3096, doi:10.3389/fimmu.2018.03096 (2018).  
22 9 Pierpont, T. M., Limper, C. B. & Richards, K. L. Past, Present, and Future of Rituximab-The  
23 World's First Oncology Monoclonal Antibody Therapy. *Front Oncol* **8**, 163,  
24 doi:10.3389/fonc.2018.00163 (2018).  
25 10 Levesque, M. C. & St Clair, E. W. B cell-directed therapies for autoimmune disease and correlates  
26 of disease response and relapse. *J Allergy Clin Immunol* **121**, 13-21; quiz 22-13,  
27 doi:10.1016/j.jaci.2007.11.030 (2008).  
28 11 Hampe, C. S. B Cell in Autoimmune Diseases. *Scientifica (Cairo)* **2012**,  
29 doi:10.6064/2012/215308 (2012).  
30 12 Kazkaz, H. & Isenberg, D. Anti B cell therapy (rituximab) in the treatment of autoimmune  
31 diseases. *Curr Opin Pharmacol* **4**, 398-402, doi:10.1016/j.coph.2004.03.006 (2004).  
32 13 Storz, U. Rituximab: how approval history is reflected by a corresponding patent filing strategy.  
33 *MAbs* **6**, 820-837, doi:10.4161/mabs.29105 (2014).  
34 14 Delate, T., Hansen, M. L., Gutierrez, A. C. & Le, K. N. Indications for Rituximab Use in an  
35 Integrated Health Care Delivery System. *J Manag Care Spec Pharm* **26**, 832-838,  
36 doi:10.18553/jmcp.2020.26.7.832 (2020).  
37 15 Strohl, W. R. Current progress in innovative engineered antibodies. *Protein Cell* **9**, 86-120,  
38 doi:10.1007/s13238-017-0457-8 (2018).  
39 16 Van Allen, E. M., Miyake, T., Gunn, N., Behler, C. M. & Kohlwes, J. Off-label use of rituximab  
40 in a multipayer insurance system. *J Oncol Pract* **7**, 76-79, doi:10.1200/JOP.2010.000042 (2011).  
41 17 Bertolini, F., Sukhatme, V. P. & Bouche, G. Drug repurposing in oncology--patient and health  
42 systems opportunities. *Nat Rev Clin Oncol* **12**, 732-742, doi:10.1038/nrclinonc.2015.169 (2015).  
43 18 Lee, D. S. W., Rojas, O. L. & Gomerman, J. L. B cell depletion therapies in autoimmune  
44 disease: advances and mechanistic insights. *Nat Rev Drug Discov* **20**, 179-199,  
45 doi:10.1038/s41573-020-00092-2 (2021).  
46 19 Mease, P. J. B cell-targeted therapy in autoimmune disease: rationale, mechanisms, and clinical  
47 application. *J Rheumatol* **35**, 1245-1255 (2008).



- 1 20 Looney, R. J. B cells as a therapeutic target in autoimmune diseases other than rheumatoid  
2 arthritis. *Rheumatology (Oxford)* **44 Suppl 2**, ii13-ii17, doi:10.1093/rheumatology/keh618  
3 (2005).
- 4 21 Pateinakis, P. & Pyrpasopoulou, A. CD20+ B cell depletion in systemic autoimmune diseases:  
5 common mechanism of inhibition or disease-specific effect on humoral immunity? *Biomed Res*  
6 *Int* **2014**, 973609, doi:10.1155/2014/973609 (2014).
- 7 22 Crickx, E., Weill, J. C., Reynaud, C. A. & Mahévas, M. Anti-CD20-mediated B-cell depletion  
8 in autoimmune diseases: successes, failures and future perspectives. *Kidney Int* **97**, 885-893,  
9 doi:10.1016/j.kint.2019.12.025 (2020).
- 10 23 Du, F. H., Mills, E. A. & Mao-Draayer, Y. Next-generation anti-CD20 monoclonal antibodies  
11 in autoimmune disease treatment. *Auto Immun Highlights* **8**, 12, doi:10.1007/s13317-017-0100-  
12 y (2017).
- 13 24 Eisenberg, R. & Looney, R. J. The therapeutic potential of anti-CD20 "what do B-cells do?".  
14 *Clin Immunol* **117**, 207-213, doi:10.1016/j.clim.2005.08.006 (2005).
- 15 25 Rosenblum, M. D., Remedios, K. A. & Abbas, A. K. Mechanisms of human autoimmunity. *J*  
16 *Clin Invest* **125**, 2228-2233, doi:10.1172/jci78088 (2015).
- 17 26 Chandrashekhara, S. The treatment strategies of autoimmune disease may need a different  
18 approach from conventional protocol: a review. *Indian J Pharmacol* **44**, 665-671,  
19 doi:10.4103/0253-7613.103235 (2012).
- 20 27 Ngo, H. X. & Garneau-Tsodikova, S. What are the drugs of the future? *Medchemcomm* **9**, 757-  
21 758, doi:10.1039/c8md90019a (2018).
- 22 28 Fugger, L., Jensen, L. T. & Rossjohn, J. Challenges, Progress, and Prospects of Developing  
23 Therapies to Treat Autoimmune Diseases. *Cell* **181**, 63-80, doi:10.1016/j.cell.2020.03.007  
24 (2020).
- 25 29 Emer, J. J. & Claire, W. Rituximab: a review of dermatological applications. *J Clin Aesthet*  
26 *Dermatol* **2**, 29-37 (2009).
- 27 30 Kläsener, K. *et al.* CD20 as a gatekeeper of the resting state of human B cells. *Proc Natl Acad*  
28 *Sci U S A* **118**, doi:10.1073/pnas.2021342118 (2021).
- 29 31 Protheroe, A., Edwards, J. C., Simmons, A., Maclennan, K. & Selby, P. Remission of  
30 inflammatory arthropathy in association with anti-CD20 therapy for non-Hodgkin's lymphoma.  
31 *Rheumatology (Oxford)* **38**, 1150-1152, doi:10.1093/rheumatology/38.11.1150 (1999).
- 32 32 Pushpakom, S. *et al.* Drug repurposing: progress, challenges and recommendations. *Nat Rev*  
33 *Drug Discov* **18**, 41-58, doi:10.1038/nrd.2018.168 (2019).
- 34 33 Volkov, M., van Schie, K. A. & van der Woude, D. Autoantibodies and B Cells: The ABC of  
35 rheumatoid arthritis pathophysiology. *Immunol Rev* **294**, 148-163, doi:10.1111/imr.12829  
36 (2020).
- 37 34 Chauhan, K., Jandu, J. S., Goyal, A. & Al-Dhahir, M. A. Rheumatoid Arthritis. *StatPearls*  
38 *[Internet]* (2022).
- 39 35 van Delft, M. A. M. & Huizinga, T. W. J. An overview of autoantibodies in rheumatoid  
40 arthritis. *J Autoimmun* **110**, 102392, doi:10.1016/j.jaut.2019.102392 (2020).
- 41 36 Tavakolpour, S. *et al.* A comprehensive review of rituximab therapy in rheumatoid arthritis  
42 patients. *Clin Rheumatol* **38**, 2977-2994, doi:10.1007/s10067-019-04699-8 (2019).
- 43 37 Strand, V. *et al.* Sustained benefit in rheumatoid arthritis following one course of rituximab:  
44 improvements in physical function over 2 years. *Rheumatology (Oxford)* **45**, 1505-1513,  
45 doi:10.1093/rheumatology/keh358 (2006).
- 46 38 Edwards, J. C. *et al.* Efficacy of B-cell-targeted therapy with rituximab in patients with  
47 rheumatoid arthritis. *N Engl J Med* **350**, 2572-2581, doi:10.1056/NEJMoa032534 (2004).



- 1 39 Silverman, G. J. & Carson, D. A. Roles of B cells in rheumatoid arthritis. *Arthritis Res Ther* **5**  
2 **Suppl 4**, S1-6, doi:10.1186/ar1010 (2003).
- 3 40 Bryl, E. B cells as target for immunotherapy in rheumatic diseases - current status. *Immunol*  
4 *Lett* **236**, 12-19, doi:10.1016/j.imlet.2021.05.006 (2021).
- 5 41 Jain, R. W. & Yong, V. W. B cells in central nervous system disease: diversity, locations and  
6 pathophysiology. *Nat Rev Immunol* **22**, 513-524, doi:10.1038/s41577-021-00652-6 (2022).
- 7 42 Alcalá, C. *et al.* Effectiveness of rituximab vs. ocrelizumab for the treatment of primary  
8 progressive multiple sclerosis: a real-world observational study. *J Neurol* **269**, 3676-3681,  
9 doi:10.1007/s00415-022-10989-0 (2022).
- 10 43 Calabresi, P. A. B-Cell Depletion - A Frontier in Monoclonal Antibodies for Multiple Sclerosis.  
11 *N Engl J Med* **376**, 280-282, doi:10.1056/NEJMe1614717 (2017).
- 12 44 Chisari, C. G. *et al.* Rituximab for the treatment of multiple sclerosis: a review. *J Neurol* **269**,  
13 159-183, doi:10.1007/s00415-020-10362-z (2022).
- 14 45 Duddy, M. *et al.* Distinct effector cytokine profiles of memory and naive human B cell subsets  
15 and implication in multiple sclerosis. *J Immunol* **178**, 6092-6099,  
16 doi:10.4049/jimmunol.178.10.6092 (2007).
- 17 46 Durozard, P. *et al.* Efficacy of rituximab in refractory RRMS. *Mult Scler* **25**, 828-836,  
18 doi:10.1177/1352458518772748 (2019).
- 19 47 Granqvist, M. *et al.* Comparative Effectiveness of Rituximab and Other Initial Treatment  
20 Choices for Multiple Sclerosis. *JAMA Neurol* **75**, 320-327, doi:10.1001/jamaneurol.2017.4011  
21 (2018).
- 22 48 Holloman, J. P., Axtell, R. C., Monson, N. L. & Wu, G. F. The Role of B Cells in Primary  
23 Progressive Multiple Sclerosis. *Front Neurol* **12**, 680581, doi:10.3389/fneur.2021.680581  
24 (2021).
- 25 49 Kuerten, S. *et al.* Autoantibodies against central nervous system antigens in a subset of B cell-  
26 dominant multiple sclerosis patients. *Proc Natl Acad Sci U S A* **117**, 21512-21518,  
27 doi:10.1073/pnas.2011249117 (2020).
- 28 50 Miller, D., Barkhof, F., Montalban, X., Thompson, A. & Filippi, M. Clinically isolated  
29 syndromes suggestive of multiple sclerosis, part I: natural history, pathogenesis, diagnosis, and  
30 prognosis. *Lancet Neurol* **4**, 281-288, doi:10.1016/s1474-4422(05)70071-5 (2005).
- 31 51 Naegelin, Y. *et al.* Association of Rituximab Treatment With Disability Progression Among  
32 Patients With Secondary Progressive Multiple Sclerosis. *JAMA Neurol* **76**, 274-281,  
33 doi:10.1001/jamaneurol.2018.4239 (2019).
- 34 52 Siddiqui, M. K. *et al.* Use of rituximab in adults with relapsing-remitting multiple sclerosis: a  
35 systematic literature review. *Curr Med Res Opin* **36**, 809-826,  
36 doi:10.1080/03007995.2020.1739009 (2020).
- 37 53 Svenningsson, A. *et al.* Safety and efficacy of rituximab versus dimethyl fumarate in patients  
38 with relapsing-remitting multiple sclerosis or clinically isolated syndrome in Sweden: a rater-  
39 blinded, phase 3, randomised controlled trial. *Lancet Neurol* **21**, 693-703, doi:10.1016/s1474-  
40 4422(22)00209-5 (2022).
- 41 54 van Langelaar, J., Rijvers, L., Smolders, J. & van Luijn, M. M. B and T Cells Driving Multiple  
42 Sclerosis: Identity, Mechanisms and Potential Triggers. *Front Immunol* **11**, 760,  
43 doi:10.3389/fimmu.2020.00760 (2020).
- 44 55 Brancati, S., Gozzo, L., Longo, L., Vitale, D. C. & Drago, F. Rituximab in Multiple Sclerosis:  
45 Are We Ready for Regulatory Approval? *Front Immunol* **12**, 661882,  
46 doi:10.3389/fimmu.2021.661882 (2021).
- 47 56 Bhandari, P. R. & Pai, V. V. Novel applications of Rituximab in dermatological disorders.  
48 *Indian Dermatol Online J* **5**, 250-259, doi:10.4103/2229-5178.137766 (2014).

- 1 57 Lampel, H. P., Silvestri, D.L. Systemic Contact Dermatitis: Current Challenges and Emerging  
2 Treatments. *Curr Treat Options Allergy* **1**, 348–357, doi:10.1007/s40521-014-0029-6 (2014).
- 3 58 Anandan, V., Jameela, W. A., Sowmiya, R., Kumar, M. M. S. & Lavanya, P. Rituximab: A  
4 Magic Bullet for Pemphigus. *J Clin Diagn Res* **11**, Wc01-wc06,  
5 doi:10.7860/jcdr/2017/21868.9717 (2017).
- 6 59 Chen, D. M. *et al.* Rituximab is an effective treatment in patients with pemphigus vulgaris and  
7 demonstrates a steroid-sparing effect. *Br J Dermatol* **182**, 1111-1119, doi:10.1111/bjd.18482  
8 (2020).
- 9 60 Didona, D., Maglie, R., Eming, R. & Hertl, M. Pemphigus: Current and Future Therapeutic  
10 Strategies. *Front Immunol* **10**, 1418, doi:10.3389/fimmu.2019.01418 (2019).
- 11 61 Frampton, J. E. Rituximab: A Review in Pemphigus Vulgaris. *Am J Clin Dermatol* **21**, 149-156,  
12 doi:10.1007/s40257-019-00497-9 (2020).
- 13 62 Giordano, C. N. & Sinha, A. A. Cytokine networks in Pemphigus vulgaris: An integrated  
14 viewpoint. *Autoimmunity* **45**, 427-439, doi:10.3109/08916934.2012.697593 (2012).
- 15 63 Hertl, M. & Riechers, R. Analysis of the T cells that are potentially involved in autoantibody  
16 production in pemphigus vulgaris. *J Dermatol* **26**, 748-752, doi:10.1111/j.1346-  
17 8138.1999.tb02086.x (1999).
- 18 64 Murrell, D. F. *et al.* Diagnosis and management of pemphigus: Recommendations of an  
19 international panel of experts. *J Am Acad Dermatol* **82**, 575-585.e571,  
20 doi:10.1016/j.jaad.2018.02.021 (2020).
- 21 65 Satyam, A., Khandpur, S., Sharma, V. K. & Sharma, A. Involvement of T(H)1/T(H)2 cytokines  
22 in the pathogenesis of autoimmune skin disease-Pemphigus vulgaris. *Immunol Invest* **38**, 498-  
23 509, doi:10.1080/08820130902943097 (2009).
- 24 66 Zambruno, G. & Borradori, L. Rituximab immunotherapy in pemphigus: therapeutic effects  
25 beyond B-cell depletion. *J Invest Dermatol* **128**, 2745-2747, doi:10.1038/jid.2008.330 (2008).
- 26 67 Campi, I. *et al.* Therapy With Different Dose Regimens of Rituximab in Patients With Active  
27 Moderate-To-Severe Graves' Orbitopathy. *Front Endocrinol (Lausanne)* **12**, 790246,  
28 doi:10.3389/fendo.2021.790246 (2021).
- 29 68 Ajjan, R. A., Watson, P. F. & Weetman, A. P. Cytokines and thyroid function. *Adv*  
30 *Neuroimmunol* **6**, 359-386, doi:10.1016/s0960-5428(97)00027-7 (1996).
- 31 69 Davies, T. F. *et al.* Graves' disease. *Nat Rev Dis Primers* **6**, 52, doi:10.1038/s41572-020-0184-y  
32 (2020).
- 33 70 Ehlers, M., Allelein, S. & Schott, M. TSH-receptor autoantibodies: pathophysiology, assay  
34 methods, and clinical applications. *Minerva Endocrinol* **43**, 323-332, doi:10.23736/s0391-  
35 1977.17.02791-2 (2018).
- 36 71 Hegedüs, L., Smith, T. J., Douglas, R. S. & Nielsen, C. H. Targeted biological therapies for  
37 Graves' disease and thyroid-associated ophthalmopathy. Focus on B-cell depletion with  
38 Rituximab. *Clin Endocrinol (Oxf)* **74**, 1-8, doi:10.1111/j.1365-2265.2010.03806.x (2011).
- 39 72 Ostrowski, R. A., Bussey, M. R., Shayesteh, Y. & Jay, W. M. Rituximab in the Treatment of  
40 Thyroid Eye Disease: A Review. *Neuroophthalmology* **39**, 109-115,  
41 doi:10.3109/01658107.2015.1039140 (2015).
- 42 73 Rydzewska, M., Jaromin, M., Pasierowska, I. E., Stożek, K. & Bossowski, A. Role of the T and  
43 B lymphocytes in pathogenesis of autoimmune thyroid diseases. *Thyroid Res* **11**, 2,  
44 doi:10.1186/s13044-018-0046-9 (2018).
- 45 74 Salvi, M., Vannucchi, G. & Beck-Peccoz, P. Potential utility of rituximab for Graves'  
46 orbitopathy. *J Clin Endocrinol Metab* **98**, 4291-4299, doi:10.1210/jc.2013-1804 (2013).

- 1 75 Salvi, M. *et al.* Treatment of Graves' disease and associated ophthalmopathy with the anti-  
2 CD20 monoclonal antibody rituximab: an open study. *Eur J Endocrinol* **156**, 33-40,  
3 doi:10.1530/eje.1.02325 (2007).
- 4 76 Zha, B. *et al.* Distribution of lymphocyte subpopulations in thyroid glands of human  
5 autoimmune thyroid disease. *J Clin Lab Anal* **28**, 249-254, doi:10.1002/jcla.21674 (2014).
- 6 77 Gianoukakis, A. G., Khadavi, N. & Smith, T. J. Cytokines, Graves' disease, and thyroid-  
7 associated ophthalmopathy. *Thyroid* **18**, 953-958, doi:10.1089/thy.2007.0405 (2008).
- 8 78 Afzal, W., Owlia, M. B., Hasni, S. & Newman, K. A. Autoimmune Neutropenia Updates:  
9 Etiology, Pathology, and Treatment. *South Med J* **110**, 300-307,  
10 doi:10.14423/smj.0000000000000637 (2017).
- 11 79 Bigot, W. *et al.* Efficacy and safety of rituximab for autoimmune neutropenia: a French case  
12 series and literature review. *Rheumatology (Oxford)* **59**, 2637-2640,  
13 doi:10.1093/rheumatology/keaa045 (2020).
- 14 80 Chaudhari, P. M. & Mukkamalla, S. K. R. Autoimmune And Chronic Neutropenia. *StatPearls*  
15 *[Internet]* (2022).
- 16 81 Papadaki, H. A. & Pontikoglou, C. Pathophysiologic mechanisms, clinical features and  
17 treatment of idiopathic neutropenia. *Expert Rev Hematol* **1**, 217-229,  
18 doi:10.1586/17474086.1.2.217 (2008).
- 19 82 Papadaki, H. A. *et al.* Activated T-lymphocytes with myelosuppressive properties in patients  
20 with chronic idiopathic neutropenia. *Br J Haematol* **128**, 863-876, doi:10.1111/j.1365-  
21 2141.2005.05380.x (2005).
- 22 83 Wlodarski, M. W., Nearman, Z., Jiang, Y., Lichtin, A. & Maciejewski, J. P. Clonal  
23 predominance of CD8(+) T cells in patients with unexplained neutropenia. *Exp Hematol* **36**,  
24 293-300, doi:10.1016/j.exphem.2007.11.011 (2008).
- 25 84 Bleesing, J. J., Nagaraj, C. B. & Zhang, K. Autoimmune Lymphoproliferative Syndrome.  
26 *GeneReviews® [Internet]* (2017).
- 27 85 Deutsch, M., Tsopanou, E. & Dourakis, S. P. The autoimmune lymphoproliferative syndrome  
28 (Canale-Smith) in adulthood. *Clin Rheumatol* **23**, 43-44, doi:10.1007/s10067-003-0830-2  
29 (2004).
- 30 86 Drappa, J., Vaishnav, A. K., Sullivan, K. E., Chu, J. L. & Elkon, K. B. Fas gene mutations in  
31 the Canale-Smith syndrome, an inherited lymphoproliferative disorder associated with  
32 autoimmunity. *N Engl J Med* **335**, 1643-1649, doi:10.1056/nejm199611283352204 (1996).
- 33 87 Grodzicky, T., Bussel, J. B. & Elkon, K. B. Anti-platelet antibodies associated with the Canale-  
34 Smith syndrome bind to the same platelet glycoprotein complexes as those of idiopathic  
35 thrombocytopenic purpura patients. *Clin Exp Immunol* **127**, 289-292, doi:10.1046/j.1365-  
36 2249.2002.01750.x (2002).
- 37 88 Heelan, B. T. *et al.* Effect of anti-CD20 (rituximab) on resistant thrombocytopenia in  
38 autoimmune lymphoproliferative syndrome. *Br J Haematol* **118**, 1078-1081,  
39 doi:10.1046/j.1365-2141.2002.03753.x (2002).
- 40 89 Lambert, M. P. Presentation and diagnosis of autoimmune lymphoproliferative syndrome  
41 (ALPS). *Expert Rev Clin Immunol* **17**, 1163-1173, doi:10.1080/1744666x.2021.1978842  
42 (2021).
- 43 90 Rao, V. K. *et al.* Use of rituximab for refractory cytopenias associated with autoimmune  
44 lymphoproliferative syndrome (ALPS). *Pediatr Blood Cancer* **52**, 847-852,  
45 doi:10.1002/pbc.21965 (2009).
- 46 91 Teachey, D. T. New advances in the diagnosis and treatment of autoimmune  
47 lymphoproliferative syndrome. *Curr Opin Pediatr* **24**, 1-8,  
48 doi:10.1097/MOP.0b013e32834ea739 (2012).

- 1 92 Worth, A., Thrasher, A. J. & Gaspar, H. B. Autoimmune lymphoproliferative syndrome:  
2 molecular basis of disease and clinical phenotype. *Br J Haematol* **133**, 124-140,  
3 doi:10.1111/j.1365-2141.2006.05993.x (2006).
- 4 93 Teachey, D. T. & Lambert, M. P. Diagnosis and management of autoimmune cytopenias in  
5 childhood. *Pediatr Clin North Am* **60**, 1489-1511, doi:10.1016/j.pcl.2013.08.009 (2013).
- 6 94 Froissart, A. *et al.* Efficacy and safety of first-line rituximab in severe, acquired thrombotic  
7 thrombocytopenic purpura with a suboptimal response to plasma exchange. Experience of the  
8 French Thrombotic Microangiopathies Reference Center. *Crit Care Med* **40**, 104-111,  
9 doi:10.1097/CCM.0b013e31822e9d66 (2012).
- 10 95 Sadler, J. E. Pathophysiology of thrombotic thrombocytopenic purpura. *Blood* **130**, 1181-1188,  
11 doi:10.1182/blood-2017-04-636431 (2017).
- 12 96 Sarmiento Maldonado, M. *et al.* [Treatment of thrombotic thrombocytopenic purpura with  
13 rituximab. Report of eight cases]. *Rev Med Chil* **143**, 809-811, doi:10.4067/s0034-  
14 98872015000600016 (2015).
- 15 97 Sukumar, S., Lämmle, B. & Cataland, S. R. Thrombotic Thrombocytopenic Purpura:  
16 Pathophysiology, Diagnosis, and Management. *J Clin Med* **10**, doi:10.3390/jcm10030536  
17 (2021).
- 18 98 Tsai, H. M. Thrombotic Thrombocytopenic Purpura: Beyond Empiricism and Plasma  
19 Exchange. *Am J Med* **132**, 1032-1037, doi:10.1016/j.amjmed.2019.03.009 (2019).
- 20 99 Verbij, F. C. *et al.* CD4+ T cells from patients with acquired thrombotic thrombocytopenic  
21 purpura recognize CUB2 domain-derived peptides. *Blood* **127**, 1606-1609, doi:10.1182/blood-  
22 2015-10-668053 (2016).
- 23 100 Wada, H., Minami, N. & Shirakawa, S. [Cytokine levels in patients with thrombotic  
24 thrombocytopenic purpura]. *Nihon Rinsho* **51**, 151-154 (1993).
- 25 101 Westwood, J. P., Langley, K., Heelas, E., Machin, S. J. & Scully, M. Complement and cytokine  
26 response in acute Thrombotic Thrombocytopenic Purpura. *Br J Haematol* **164**, 858-866,  
27 doi:10.1111/bjh.12707 (2014).
- 28 102 Hasan, A. *et al.* Repeated courses of rituximab in chronic ITP: Three different regimens. *Am J*  
29 *Hematol* **84**, 661-665, doi:10.1002/ajh.21512 (2009).
- 30 103 Khan, A. M., Mydra, H. & Nevarez, A. Clinical Practice Updates in the Management Of  
31 Immune Thrombocytopenia. *P T* **42**, 756-763 (2017).
- 32 104 Zhu, L., Chen, B. & Su, W. A Review of the Various Roles and Participation Levels of B-Cells  
33 in Non-Infectious Uveitis. *Front Immunol* **12**, 676046, doi:10.3389/fimmu.2021.676046 (2021).
- 34 105 Smith, J. R., Stempel, A. J., Bharadwaj, A. & Appukuttan, B. Involvement of B cells in non-  
35 infectious uveitis. *Clin Transl Immunology* **5**, e63, doi:10.1038/cti.2016.2 (2016).
- 36 106 Ng, C. C., Sy, A. & Cunningham, E. T., Jr. Rituximab for non-infectious Uveitis and Scleritis. *J*  
37 *Ophthalmic Inflamm Infect* **11**, 23, doi:10.1186/s12348-021-00252-4 (2021).
- 38 107 Amador-Patarroyo, M. J., Peñaranda, A. C. & Bernal, M. T. Chapter 37 Autoimmune uveitis.  
39 *Autoimmunity: From Bench to Bedside [Internet]* (2013).
- 40 108 El-Asrar, A. M. A. *et al.* Differential CXC and CX3C Chemokine Expression Profiles in  
41 Aqueous Humor of Patients With Specific Endogenous Uveitic Entities. *Invest Ophthalmol Vis*  
42 *Sci* **59**, 2222-2228, doi:10.1167/iovs.17-23225 (2018).
- 43 109 Gibbs, E., Matsubara, J., Cao, S., Cui, J. & Forooghian, F. Antigen-specificity of antiretinal  
44 antibodies in patients with noninfectious uveitis. *Can J Ophthalmol* **52**, 463-467,  
45 doi:10.1016/j.cjco.2017.03.010 (2017).
- 46 110 Hossain, H. A. & Foster, C. S. Autoimmune retinopathy in patients with birdshot  
47 retinochoroidopathy (BSRC) who are in remission. *Investigative Ophthalmology & Visual*  
48 *Science* **55**, 2510-2510 (2014).



- 1 111 Hysa, E. *et al.* Immunopathophysiology and clinical impact of uveitis in inflammatory  
2 rheumatic diseases: An update. *Eur J Clin Invest* **51**, e13572, doi:10.1111/eci.13572 (2021).
- 3 112 Kuiper, J., Rothova, A., de Boer, J. & Radstake, T. The immunopathogenesis of birdshot  
4 chorioretinopathy; a bird of many feathers. *Prog Retin Eye Res* **44**, 99-110,  
5 doi:10.1016/j.preteyeres.2014.11.003 (2015).
- 6 113 Kuiper, J. J., Mutis, T., de Jager, W., de Groot-Mijnes, J. D. & Rothova, A. Intraocular  
7 interleukin-17 and proinflammatory cytokines in HLA-A29-associated birdshot  
8 chorioretinopathy. *Am J Ophthalmol* **152**, 177-182.e171, doi:10.1016/j.ajo.2011.01.031 (2011).
- 9 114 Kuiper, J. J. W. & Venema, W. J. HLA-A29 and Birdshot Uveitis: Further Down the Rabbit  
10 Hole. *Front Immunol* **11**, 599558, doi:10.3389/fimmu.2020.599558 (2020).
- 11 115 Lee, R. W. *et al.* Autoimmune and autoinflammatory mechanisms in uveitis. *Semin*  
12 *Immunopathol* **36**, 581-594, doi:10.1007/s00281-014-0433-9 (2014).
- 13 116 Miserocchi, E. & Modorati, G. Rituximab for noninfectious uveitis. *Dev Ophthalmol* **51**, 98-  
14 109, doi:10.1159/000336188 (2012).
- 15 117 Murray, P. Serum autoantibodies and uveitis. *Br J Ophthalmol* **70**, 266-268,  
16 doi:10.1136/bjo.70.4.266 (1986).
- 17 118 Takeuchi, M., Mizuki, N. & Ohno, S. Pathogenesis of Non-Infectious Uveitis Elucidated by  
18 Recent Genetic Findings. *Front Immunol* **12**, 640473, doi:10.3389/fimmu.2021.640473 (2021).
- 19 119 Tomkins-Netzer, O., Taylor, S. R. & Lightman, S. Can rituximab induce long-term disease  
20 remission in patients with intra-ocular non-infectious inflammation? *Ophthalmologica* **230**,  
21 109-115, doi:10.1159/000351426 (2013).
- 22 120 Yang, P. & Foster, C. S. Interleukin 21, interleukin 23, and transforming growth factor  $\beta$ 1 in  
23 HLA-A29-associated birdshot retinochoroidopathy. *Am J Ophthalmol* **156**, 400-406.e402,  
24 doi:10.1016/j.ajo.2013.03.004 (2013).
- 25 121 Eckmann, J. D. *et al.* De Novo Colitis Associated With Rituximab in 21 Patients at a Tertiary  
26 Center. *Clin Gastroenterol Hepatol* **18**, 252-253, doi:10.1016/j.cgh.2019.03.027 (2020).
- 27 122 Spencer, J. & Bemark, M. Human intestinal B cells in inflammatory diseases. *Nat Rev*  
28 *Gastroenterol Hepatol* **20**, 254-265, doi:10.1038/s41575-023-00755-6 (2023).
- 29 123 Przemioslo, R. T. & Ciclitira, P. J. Cytokines and gastrointestinal disease mechanisms.  
30 *Baillieres Clin Gastroenterol* **10**, 17-32, doi:10.1016/s0950-3528(96)90037-8 (1996).
- 31 124 Basyal, B. & KC, P. Autoimmune Pancreatitis. *StatPearls [Internet]* (2022).
- 32 125 de Pretis, N., De Marchi, G. & Frulloni, L. Diagnosis and treatment of autoimmune pancreatitis.  
33 *Curr Opin Gastroenterol* **34**, 362-366, doi:10.1097/mog.0000000000000454 (2018).
- 34 126 Ghassem-Zadeh, S. *et al.* Distinct pathophysiological cytokine profiles for discrimination  
35 between autoimmune pancreatitis, chronic pancreatitis, and pancreatic ductal adenocarcinoma. *J*  
36 *Transl Med* **15**, 126, doi:10.1186/s12967-017-1227-3 (2017).
- 37 127 Li, S. Y., Huang, X. Y., Chen, Y. T., Liu, Y. & Zhao, S. Autoimmune pancreatitis characterized  
38 by predominant CD8+ T lymphocyte infiltration. *World J Gastroenterol* **17**, 4635-4639,  
39 doi:10.3748/wjg.v17.i41.4635 (2011).
- 40 128 Masood, M. Autoimmune pancreatitis: What we know so far. *JGH Open* **6**, 3-10,  
41 doi:10.1002/jgh3.12688 (2022).
- 42 129 Okazaki, K. *et al.* International consensus for the treatment of autoimmune pancreatitis.  
43 *Pancreatology* **17**, 1-6, doi:10.1016/j.pan.2016.12.003 (2017).
- 44 130 Pezzilli, R. & Pagano, N. Pathophysiology of autoimmune pancreatitis. *World J Gastrointest*  
45 *Pathophysiol* **5**, 11-17, doi:10.4291/wjgp.v5.i1.11 (2014).
- 46 131 Smyk, D. S. *et al.* Autoantibodies in autoimmune pancreatitis. *Int J Rheumatol* **2012**, 940831,  
47 doi:10.1155/2012/940831 (2012).

- 1 132 De Marchi, G. *et al.* Rituximab as Maintenance Therapy in Type 1 Autoimmune Pancreatitis:  
2 An Italian Experience. *Pancreas* **50**, 1363-1367, doi:10.1097/MPA.0000000000001925 (2021).
- 3 133 Kronbichler, A., Windpessl, M., Pieringer, H. & Jayne, D. R. W. Rituximab for immunologic  
4 renal disease: What the nephrologist needs to know. *Autoimmun Rev* **16**, 633-643,  
5 doi:10.1016/j.autrev.2017.04.007 (2017).
- 6 134 Mouna Malki abidi, S. B., Hajji Mariem, Tasnim Mesbahi, Amel Harzallah, Imen Gorsane,  
7 Hedri Hafedh, Hayet Kaaroud, Rym Goucha, Fethi Ben hmida. RITUXIMAB TREATMENT  
8 IN NEPHROLOGY. *Nephrology Dialysis Transplantation* **36**, doi:10.1093/ndt/gfab092.0080  
9 (2021).
- 10 135 Alchi, B. & Jayne, D. Membranoproliferative glomerulonephritis. *Pediatr Nephrol* **25**, 1409-  
11 1418, doi:10.1007/s00467-009-1322-7 (2010).
- 12 136 Fakhouri, F., Le Quintrec, M. & Frémeaux-Bacchi, V. Practical management of C3  
13 glomerulopathy and Ig-mediated MPGN: facts and uncertainties. *Kidney Int* **98**, 1135-1148,  
14 doi:10.1016/j.kint.2020.05.053 (2020).
- 15 137 Hohenstein, B., Amann, K. & Menne, J. [Membranoproliferative glomerulonephritis and C3  
16 glomerulopathy]. *Internist (Berl)* **60**, 458-467, doi:10.1007/s00108-019-0572-0 (2019).
- 17 138 Ifuku, M. *et al.* Various roles of Th cytokine mRNA expression in different forms of  
18 glomerulonephritis. *Am J Nephrol* **38**, 115-123, doi:10.1159/000353102 (2013).
- 19 139 Summers, S. A. *et al.* Th1 and Th17 cells induce proliferative glomerulonephritis. *J Am Soc*  
20 *Nephrol* **20**, 2518-2524, doi:10.1681/asn.2009030337 (2009).
- 21 140 Kolovou, K. *et al.* B-cell oligoclonal expansions in renal tissue of patients with immune-  
22 mediated glomerular disease. *Clin Immunol* **217**, 108488, doi:10.1016/j.clim.2020.108488  
23 (2020).
- 24 141 Gorenjak, M. 4. Kidneys and Autoimmune Disease. *EJIFCC* **20**, 28-32 (2009).
- 25 142 Collins, M. *et al.* Rituximab treatment of fibrillary glomerulonephritis. *Am J Kidney Dis* **52**,  
26 1158-1162, doi:10.1053/j.ajkd.2008.07.011 (2008).
- 27 143 Ejaz, A. A., Asmar, A., Alsabbagh, M. M. & Ahsan, N. Rituximab in immunologic glomerular  
28 diseases. *MAbs* **4**, 198-207, doi:10.4161/mabs.4.2.19286 (2012).
- 29 144 Lu, Q., Zuo, L., Dong, B., Yan, Y. & Yang, B. Rituximab treatment for immune-complex-  
30 mediated membranoproliferative glomerulonephritis. *Immunotherapy* **10**, 1027-1031,  
31 doi:10.2217/imt-2018-0031 (2018).
- 32 145 Rudnicki, M. Rituximab for Treatment of Membranoproliferative Glomerulonephritis and C3  
33 Glomerulopathies. *Biomed Res Int* **2017**, 2180508, doi:10.1155/2017/2180508 (2017).
- 34 146 Santos, J. E. *et al.* Rituximab use in adult glomerulopathies and its rationale. *J Bras Nefrol* **42**,  
35 77-93, doi:10.1590/2175-8239-jbn-2018-0254 (2020).
- 36 147 Milner, E. C., Anolik, J., Cappione, A. & Sanz, I. Human innate B cells: a link between host  
37 defense and autoimmunity? *Springer Semin Immunopathol* **26**, 433-452, doi:10.1007/s00281-  
38 004-0188-9 (2005).
- 39 148 Shlomchik, M. J. Sites and stages of autoreactive B cell activation and regulation. *Immunity* **28**,  
40 18-28, doi:10.1016/j.immuni.2007.12.004 (2008).
- 41 149 Singh, N., Pirsch, J. & Samaniego, M. Antibody-mediated rejection: treatment alternatives and  
42 outcomes. *Transplant Rev (Orlando)* **23**, 34-46, doi:10.1016/j.trre.2008.08.004 (2009).
- 43 150 Baradaran, H. *et al.* Antibody-Mediated Rejection in Adult Liver Transplant Recipients: A Case  
44 Series and Literature Review. *J Clin Pharmacol* **62**, 254-271, doi:10.1002/jcph.1963 (2022).
- 45 151 Benzimra, M., Calligaro, G. L. & Glanville, A. R. Acute rejection. *J Thorac Dis* **9**, 5440-5457,  
46 doi:10.21037/jtd.2017.11.83 (2017).
- 47 152 Blume, O. R., Yost, S. E. & Kaplan, B. Antibody-mediated rejection: pathogenesis, prevention,  
48 treatment, and outcomes. *J Transplant* **2012**, 201754, doi:10.1155/2012/201754 (2012).

- 1 153 Koenig, A. *et al.* B Cells and Antibodies in Transplantation. *Transplantation* **100**, 1460-1464,  
2 doi:10.1097/tp.0000000000001069 (2016).
- 3 154 Lobo, L. J., Aris, R. M., Schmitz, J. & Neuringer, I. P. Donor-specific antibodies are associated  
4 with antibody-mediated rejection, acute cellular rejection, bronchiolitis obliterans syndrome,  
5 and cystic fibrosis after lung transplantation. *J Heart Lung Transplant* **32**, 70-77,  
6 doi:10.1016/j.healun.2012.10.007 (2013).
- 7 155 Macklin, P. S., Morris, P. J. & Knight, S. R. A systematic review of the use of rituximab for the  
8 treatment of antibody-mediated renal transplant rejection. *Transplant Rev (Orlando)* **31**, 87-95,  
9 doi:10.1016/j.trre.2017.01.002 (2017).
- 10 156 Matsuda, Y., Watanabe, T. & Li, X. K. Approaches for Controlling Antibody-Mediated  
11 Allograft Rejection Through Targeting B Cells. *Front Immunol* **12**, 682334,  
12 doi:10.3389/fimmu.2021.682334 (2021).
- 13 157 Sakamoto, S. *et al.* The efficacy of rituximab treatment for antibody-mediated rejection in liver  
14 transplantation: A retrospective Japanese nationwide study. *Hepatol Res* **51**, 990-999,  
15 doi:10.1111/hepr.13643 (2021).
- 16 158 Schinstock, C. A. *et al.* Recommended Treatment for Antibody-mediated Rejection After  
17 Kidney Transplantation: The 2019 Expert Consensus From the Transplantation Society Working  
18 Group. *Transplantation* **104**, 911-922, doi:10.1097/tp.0000000000003095 (2020).
- 19 159 Shiu, K. Y. *et al.* Graft dysfunction in chronic antibody-mediated rejection correlates with B-  
20 cell-dependent indirect antidonor alloresponses and autocrine regulation of interferon- $\gamma$   
21 production by Th1 cells. *Kidney Int* **91**, 477-492, doi:10.1016/j.kint.2016.10.009 (2017).
- 22 160 Westall, G. P., Paraskeva, M. A. & Snell, G. I. Antibody-mediated rejection. *Curr Opin Organ*  
23 *Transplant* **20**, 492-497, doi:10.1097/mot.000000000000235 (2015).
- 24 161 Zhao, Y. G. *et al.* Clinical efficacy of rituximab for acute rejection in kidney transplantation: a  
25 meta-analysis. *Int Urol Nephrol* **46**, 1225-1230, doi:10.1007/s11255-013-0599-4 (2014).
- 26 162 Kim, S. J. *et al.* Weekly rituximab followed by monthly rituximab treatment for steroid-  
27 refractory chronic graft-versus-host disease: results from a prospective, multicenter, phase II  
28 study. *Haematologica* **95**, 1935-1942, doi:10.3324/haematol.2010.026104 (2010).
- 29 163 Klobuch, S. *et al.* Long-term follow-up of rituximab in treatment of chronic graft-versus-host  
30 disease-single center experience. *Ann Hematol* **98**, 2399-2405, doi:10.1007/s00277-019-03768-  
31 x (2019).
- 32 164 Sun, Y., Tawara, I., Toubai, T. & Reddy, P. Pathophysiology of acute graft-versus-host disease:  
33 recent advances. *Transl Res* **150**, 197-214, doi:10.1016/j.trsl.2007.06.003 (2007).
- 34 165 Solomon, S. R. *et al.* Safety and efficacy of rituximab-based first line treatment of chronic  
35 GVHD. *Bone Marrow Transplant* **54**, 1218-1226, doi:10.1038/s41409-018-0399-7 (2019).
- 36 166 Zeiser, R. & Blazar, B. R. Pathophysiology of Chronic Graft-versus-Host Disease and  
37 Therapeutic Targets. *N Engl J Med* **377**, 2565-2579, doi:10.1056/NEJMr1703472 (2017).
- 38 167 Aimo, A., Tavoni, A., Buda, G. & Emdin, M. Rituximab as a novel treatment for heart failure:  
39 evidence from a case series. *Eur Heart J Case Rep* **3**, 1-2, doi:10.1093/ehjcr/ytz227 (2019).
- 40 168 Caforio, A. L. *et al.* Autoimmune myocarditis and dilated cardiomyopathy: focus on cardiac  
41 autoantibodies. *Lupus* **14**, 652-655, doi:10.1191/0961203305lu2193oa (2005).
- 42 169 Caforio, A. L. *et al.* Clinical implications of anti-heart autoantibodies in myocarditis and dilated  
43 cardiomyopathy. *Autoimmunity* **41**, 35-45, doi:10.1080/08916930701619235 (2008).
- 44 170 Caforio, A. L., Mahon, N. J., Tona, F. & McKenna, W. J. Circulating cardiac autoantibodies in  
45 dilated cardiomyopathy and myocarditis: pathogenetic and clinical significance. *Eur J Heart*  
46 *Fail* **4**, 411-417, doi:10.1016/s1388-9842(02)00010-7 (2002).

- 1 171 Garcia-Rivas, G. *et al.* The role of B cells in heart failure and implications for future  
2 immunomodulatory treatment strategies. *ESC Heart Fail* **7**, 1387-1399, doi:10.1002/ehf2.12744  
3 (2020).
- 4 172 Bracamonte-Baran, W. & Čiháková, D. Cardiac Autoimmunity: Myocarditis. *Adv Exp Med Biol*  
5 **1003**, 187-221, doi:10.1007/978-3-319-57613-8\_10 (2017).
- 6 173 Bruestle, K., Hackner, K., Kreye, G. & Heidecker, B. Autoimmunity in Acute Myocarditis:  
7 How Immunopathogenesis Steers New Directions for Diagnosis and Treatment. *Curr Cardiol*  
8 *Rep* **22**, 28, doi:10.1007/s11886-020-01278-1 (2020).
- 9 174 Caforio, A. L., Mahon, N. J. & McKenna, W. J. Cardiac autoantibodies to myosin and other  
10 heart-specific autoantigens in myocarditis and dilated cardiomyopathy. *Autoimmunity* **34**, 199-  
11 204, doi:10.3109/08916930109007385 (2001).
- 12 175 Efthimiadis, I., Skendros, P., Sarantopoulos, A. & Boura, P. CD4+/CD25+ T-Lymphocytes and  
13 Th1/Th2 regulation in dilated cardiomyopathy. *Hippokratia* **15**, 335-342 (2011).
- 14 176 Lasrado, N. & Reddy, J. An overview of the immune mechanisms of viral myocarditis. *Rev*  
15 *Med Virol* **30**, 1-14, doi:10.1002/rmv.2131 (2020).
- 16 177 Maisch, B. Cardio-Immunology of Myocarditis: Focus on Immune Mechanisms and Treatment  
17 Options. *Front Cardiovasc Med* **6**, 48, doi:10.3389/fcvm.2019.00048 (2019).
- 18 178 Myers, J. M. *et al.* Cardiac myosin-Th17 responses promote heart failure in human myocarditis.  
19 *JCI Insight* **1**, doi:10.1172/jci.insight.85851 (2016).
- 20 179 Rose, N. R. Critical cytokine pathways to cardiac inflammation. *J Interferon Cytokine Res* **31**,  
21 705-710, doi:10.1089/jir.2011.0057 (2011).
- 22 180 Tam, P. E. Coxsackievirus myocarditis: interplay between virus and host in the pathogenesis of  
23 heart disease. *Viral Immunol* **19**, 133-146, doi:10.1089/vim.2006.19.133 (2006).
- 24 181 Tschöpe, C. *et al.* Myocarditis and inflammatory cardiomyopathy: current evidence and future  
25 directions. *Nat Rev Cardiol* **18**, 169-193, doi:10.1038/s41569-020-00435-x (2021).
- 26 182 Tschöpe, C. *et al.* Targeting CD20+ B-lymphocytes in inflammatory dilated cardiomyopathy  
27 with rituximab improves clinical course: a case series. *Eur Heart J Case Rep* **3**,  
28 doi:10.1093/ehjcr/ytz131 (2019).
- 29 183 Zhao, L. & Fu, Z. Roles of Host Immunity in Viral Myocarditis and Dilated Cardiomyopathy. *J*  
30 *Immunol Res* **2018**, 5301548, doi:10.1155/2018/5301548 (2018).
- 31 184 Denis, M. Proinflammatory cytokines in hypersensitivity pneumonitis. *Am J Respir Crit Care*  
32 *Med* **151**, 164-169, doi:10.1164/ajrccm.151.1.7812548 (1995).
- 33 185 Glasser, S. W., Hardie, W. D. & Hagood, J. S. Pathogenesis of Interstitial Lung Disease in  
34 Children and Adults. *Pediatr Allergy Immunol Pulmonol* **23**, 9-14, doi:10.1089/ped.2010.0004  
35 (2010).
- 36 186 Hirose, M. *et al.* B cell-activating factors in autoimmune pulmonary alveolar proteinosis.  
37 *Orphanet J Rare Dis* **16**, 115, doi:10.1186/s13023-021-01755-y (2021).
- 38 187 McCarthy, C., Carey, B. C. & Trapnell, B. C. Autoimmune Pulmonary Alveolar Proteinosis.  
39 *Am J Respir Crit Care Med* **205**, 1016-1035, doi:10.1164/rccm.202112-2742SO (2022).
- 40 188 McSharry, C., Anderson, K., Bourke, S. J. & Boyd, G. Takes your breath away--the  
41 immunology of allergic alveolitis. *Clin Exp Immunol* **128**, 3-9, doi:10.1046/j.1365-  
42 2249.2002.01849.x (2002).
- 43 189 Sugiyama, Y., Kasahara, T., Mukaida, N., Matsushima, K. & Kitamura, S. Chemokines in  
44 bronchoalveolar lavage fluid in summer-type hypersensitivity pneumonitis. *Eur Respir J* **8**,  
45 1084-1090, doi:10.1183/09031936.95.08071084 (1995).
- 46 190 Vasakova, M. *et al.* Hypersensitivity Pneumonitis: Current Concepts of Pathogenesis and  
47 Potential Targets for Treatment. *Am J Respir Crit Care Med* **200**, 301-308,  
48 doi:10.1164/rccm.201903-0541PP (2019).



- 1 191 Ye, Q., Nakamura, S., Sarria, R., Costabel, U. & Guzman, J. Interleukin 12, interleukin 18, and  
2 tumor necrosis factor alpha release by alveolar macrophages: acute and chronic hypersensitivity  
3 pneumonitis. *Ann Allergy Asthma Immunol* **102**, 149-154, doi:10.1016/s1081-1206(10)60246-3  
4 (2009).
- 5 192 ARVELO CASTRO, L. *et al.* B-cell infiltration varies among patients with interstitial lung  
6 diseases. *European Respiratory Journal* **48**, PA3099, doi:doi.org/10.1183/13993003.congress-  
7 2016.PA3099 (2016).
- 8 193 Keir, G. J. *et al.* Rituximab in severe, treatment-refractory interstitial lung disease. *Respirology*  
9 **19**, 353-359, doi:10.1111/resp.12214 (2014).
- 10 194 Ferreira, M. *et al.* Efficacy and safety of rituximab in patients with chronic hypersensitivity  
11 pneumonitis (cHP): A retrospective, multicentric, observational study. *Respir Med* **172**, 106146,  
12 doi:10.1016/j.rmed.2020.106146 (2020).
- 13 195 Kavuru, M. S. *et al.* An open-label trial of rituximab therapy in pulmonary alveolar proteinosis.  
14 *Eur Respir J* **38**, 1361-1367, doi:10.1183/09031936.00197710 (2011).
- 15 196 Lota, H. K. *et al.* Novel use of rituximab in hypersensitivity pneumonitis refractory to  
16 conventional treatment. *Thorax* **68**, 780-781, doi:10.1136/thoraxjnl-2013-203265 (2013).
- 17 197 Malur, A. *et al.* Rituximab therapy in pulmonary alveolar proteinosis improves alveolar  
18 macrophage lipid homeostasis. *Respir Res* **13**, 46, doi:10.1186/1465-9921-13-46 (2012).
- 19 198 Shitenberg, D., Fruchter, O., Fridel, L. & Kramer, M. R. Successful Rituximab Therapy in  
20 Steroid-Resistant, Cryptogenic Organizing Pneumonia: A Case Series. *Respiration* **90**, 155-159,  
21 doi:10.1159/000430100 (2015).
- 22 199 Taylor, S. A., Assis, D. N. & Mack, C. L. The Contribution of B Cells in Autoimmune Liver  
23 Diseases. *Semin Liver Dis* **39**, 422-431, doi:10.1055/s-0039-1688751 (2019).
- 24 200 Whitehead, B. & Kriegermeier, A. Natural history and management of refractory autoimmune  
25 hepatitis. *Clin Liver Dis (Hoboken)* **20**, 120-123, doi:10.1002/cld.1231 (2022).
- 26 201 Akberova, D., Kiassov, A. P. & Abdulganieva, D. Serum Cytokine Levels and Their Relation to  
27 Clinical Features in Patients with Autoimmune Liver Diseases. *J Immunol Res* **2017**, 9829436,  
28 doi:10.1155/2017/9829436 (2017).
- 29 202 Behfarjam, F. *et al.* Role of Th1/Th2 cells and related cytokines in autoimmune hepatitis. *Turk*  
30 *J Gastroenterol* **28**, 110-114, doi:10.5152/tjg.2017.17501 (2017).
- 31 203 Bogdanos, D. P., Invernizzi, P., Mackay, I. R. & Vergani, D. Autoimmune liver serology:  
32 current diagnostic and clinical challenges. *World J Gastroenterol* **14**, 3374-3387,  
33 doi:10.3748/wjg.14.3374 (2008).
- 34 204 Cargill, T. & Culver, E. L. The Role of B Cells and B Cell Therapies in Immune-Mediated  
35 Liver Diseases. *Front Immunol* **12**, 661196, doi:10.3389/fimmu.2021.661196 (2021).
- 36 205 Mieli-Vergani, G. *et al.* Autoimmune hepatitis. *Nat Rev Dis Primers* **4**, 18017,  
37 doi:10.1038/nrdp.2018.17 (2018).
- 38 206 Burak, K. W. *et al.* Rituximab for the treatment of patients with autoimmune hepatitis who are  
39 refractory or intolerant to standard therapy. *Can J Gastroenterol* **27**, 273-280,  
40 doi:10.1155/2013/512624 (2013).
- 41 207 Than, N. N. *et al.* Efficacy of rituximab in difficult-to-manage autoimmune hepatitis: Results  
42 from the International Autoimmune Hepatitis Group. *JHEP Rep* **1**, 437-445,  
43 doi:10.1016/j.jhepr.2019.10.005 (2019).
- 44 208 Terziroli Beretta-Piccoli, B., Mieli-Vergani, G. & Vergani, D. Autoimmune hepatitis: Standard  
45 treatment and systematic review of alternative treatments. *World J Gastroenterol* **23**, 6030-  
46 6048, doi:10.3748/wjg.v23.i33.6030 (2017).

- 1 209 Chimanovitch, I. *et al.* IgG1 and IgG3 are the major immunoglobulin subclasses targeting  
2 epitopes within the NC16A domain of BP180 in pemphigoid gestationis. *J Invest Dermatol* **113**,  
3 140-142, doi:10.1046/j.1523-1747.1999.00622.x (1999).
- 4 210 Cianchini, G. *et al.* Severe persistent pemphigoid gestationis: long-term remission with  
5 rituximab. *Br J Dermatol* **157**, 388-389, doi:10.1111/j.1365-2133.2007.07982.x (2007).
- 6 211 Di Zenzo, G. *et al.* The intracellular and extracellular domains of BP180 antigen comprise  
7 novel epitopes targeted by pemphigoid gestationis autoantibodies. *J Invest Dermatol* **127**, 864-  
8 873, doi:10.1038/sj.jid.5700594 (2007).
- 9 212 Sadik, C. D., Lima, A. L. & Zillikens, D. Pemphigoid gestationis: Toward a better  
10 understanding of the etiopathogenesis. *Clin Dermatol* **34**, 378-382,  
11 doi:10.1016/j.clindermatol.2016.02.010 (2016).
- 12 213 Semkova, K. & Black, M. Pemphigoid gestationis: current insights into pathogenesis and  
13 treatment. *Eur J Obstet Gynecol Reprod Biol* **145**, 138-144, doi:10.1016/j.ejogrb.2009.05.012  
14 (2009).
- 15 214 Shornick, J. K. *et al.* Anti-HLA antibodies in pemphigoid gestationis (herpes gestationis). *Br J*  
16 *Dermatol* **129**, 257-259, doi:10.1111/j.1365-2133.1993.tb11843.x (1993).
- 17 215 Tourte, M., Brunet-Possenti, F., Mignot, S., Gavard, L. & Descamps, V. Pemphigoid  
18 gestationis: a successful preventive treatment by rituximab. *J Eur Acad Dermatol Venereol* **31**,  
19 e206-e207, doi:10.1111/jdv.13962 (2017).
- 20 216 Baek, M. J. *et al.* Increased frequencies of cochlin-specific T cells in patients with autoimmune  
21 sensorineural hearing loss. *J Immunol* **177**, 4203-4210, doi:10.4049/jimmunol.177.6.4203  
22 (2006).
- 23 217 Ciorba, A. *et al.* Autoimmune inner ear disease (AIED): A diagnostic challenge. *Int J*  
24 *Immunopathol Pharmacol* **32**, 2058738418808680, doi:10.1177/2058738418808680 (2018).
- 25 218 Cohen, S. *et al.* A pilot study of rituximab in immune-mediated inner ear disease. *Audiol*  
26 *Neurootol* **16**, 214-221, doi:10.1159/000320606 (2011).
- 27 219 Mijovic, T., Zeitouni, A. & Colmegna, I. Autoimmune sensorineural hearing loss: the otology-  
28 rheumatology interface. *Rheumatology (Oxford)* **52**, 780-789, doi:10.1093/rheumatology/ket009  
29 (2013).
- 30 220 Rubin, S. J. S., Bloom, M. S. & Robinson, W. H. B cell checkpoints in autoimmune rheumatic  
31 diseases. *Nat Rev Rheumatol* **15**, 303-315, doi:10.1038/s41584-019-0211-0 (2019).
- 32 221 Begley, C. G. *et al.* Drug repurposing: Misconceptions, challenges, and opportunities for  
33 academic researchers. *Sci Transl Med* **13**, eabd5524, doi:10.1126/scitranslmed.abd5524 (2021).
- 34 222 Lucchini, E., Zaja, F. & Bussel, J. Rituximab in the treatment of immune thrombocytopenia:  
35 what is the role of this agent in 2019? *Haematologica* **104**, 1124-1135,  
36 doi:10.3324/haematol.2019.218883 (2019).
- 37 223 Zian, Z. *et al.* The clinical efficacy of Rituximab administration in autoimmunity disorders,  
38 primary immunodeficiency diseases and malignancies. *Int Immunopharmacol* **95**, 107565,  
39 doi:10.1016/j.intimp.2021.107565 (2021).
- 40 224 Ashburn, T. T. & Thor, K. B. Drug repositioning: identifying and developing new uses for  
41 existing drugs. *Nat Rev Drug Discov* **3**, 673-683, doi:10.1038/nrd1468 (2004).

42

43

1 **Competing interests**

2 The authors declare no competing interests.

3

4 **Author contribution statement**

5 A.M. collected the data and performed the analysis. A.M., G.R., and N.J.-M.R. wrote the manuscript.

6

7 **Acknowledgements**

8 N.J.-M.R. holds a research scholar Junior 2 award from the Fonds de Recherche du Québec en Santé.

9 We thank High-Fidelity Science Communications for manuscript editing.

10

1 **Figure and Table legends:**

2

3 **Fig. 1: Rituximab targets B cell subtypes that express CD20.**

4 B cells first differentiate from bone marrow-derived hematopoietic stem cells into pro-B cells, then  
5 develop into pre-B cells, at which point they begin expressing CD20. Pre-B cells differentiate into CD20<sup>+</sup>  
6 immature B cells before leaving the bone marrow and entering the circulation and lymphoid tissue, where  
7 they become CD20 naïve B cells. Upon antigen activation, naïve B cells can either differentiate into  
8 CD20<sup>+</sup> memory B cells, then into CD20<sup>-</sup> plasma cells, or directly differentiate into CD20<sup>-</sup> plasma cells  
9 before migrating back to the bone marrow.

10

11 **Fig. 2: Roles of B cells in (auto)immunity, focusing on RA.**

12 Different mechanisms in which B cells are involved and contribute to autoimmune or immune-mediated  
13 disorders. B cells perform the following functions: they **A.** act as antigen-presenting cells (APCs) through  
14 their B cell antigen receptors (BCRs), **B.** reciprocally interact with T cells through the major  
15 histocompatibility complex class II (MHC II) and T cell receptors (TCRs), **C.** produce autoantibodies,  
16 and **D.** produce inflammatory cytokines. In RA, these B cell functions lead to osteoclast activation, which  
17 perpetuates joint inflammation.

18

19 **Fig. 3: Trends in rituximab use over time, from approval to patent expiration and beyond.**

20 To visualize the impacts of time and patent expiration on rituximab repurposing, the 1,530 articles  
21 referenced in this review were plotted based on their year of publication. The years of rituximab's  
22 approval and expiration are indicated.

23

24 **Fig 4: Rituximab repurposing across 17 medical specialties.**

25 The number of indications per medical specialty that may benefit from rituximab repurposing, based on  
26 its mechanism of action and the pathophysiology of the autoimmune disease. This is plotted alongside  
27 the number of indications for which rituximab has been used with demonstrated clinical benefit.

28

29 **Table 1: Flow chart of sytemic search strategy.**

Figure 1

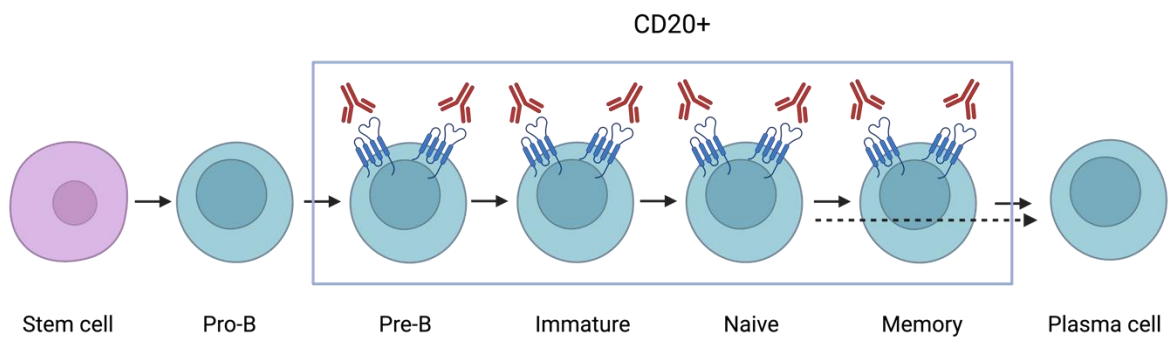

Figure 2

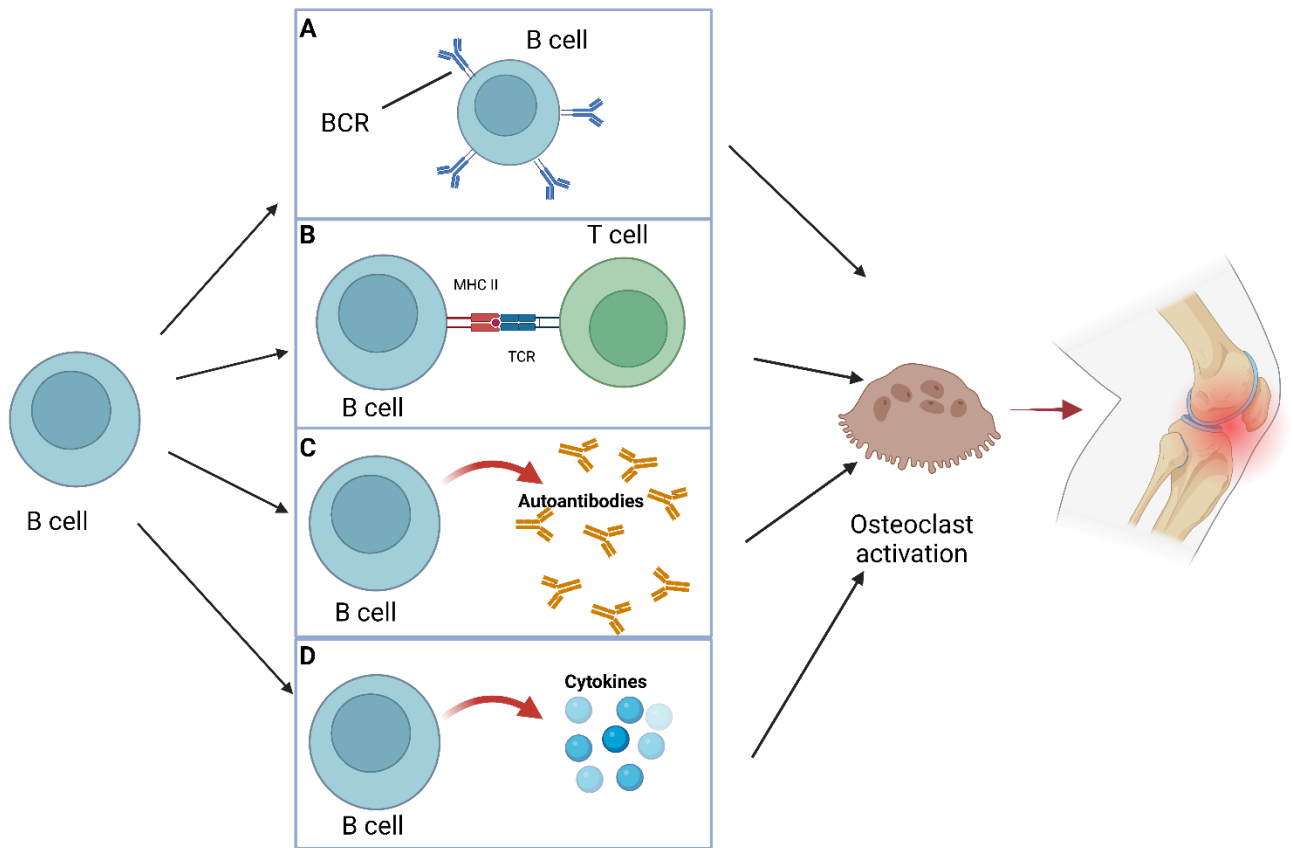

Figure 3

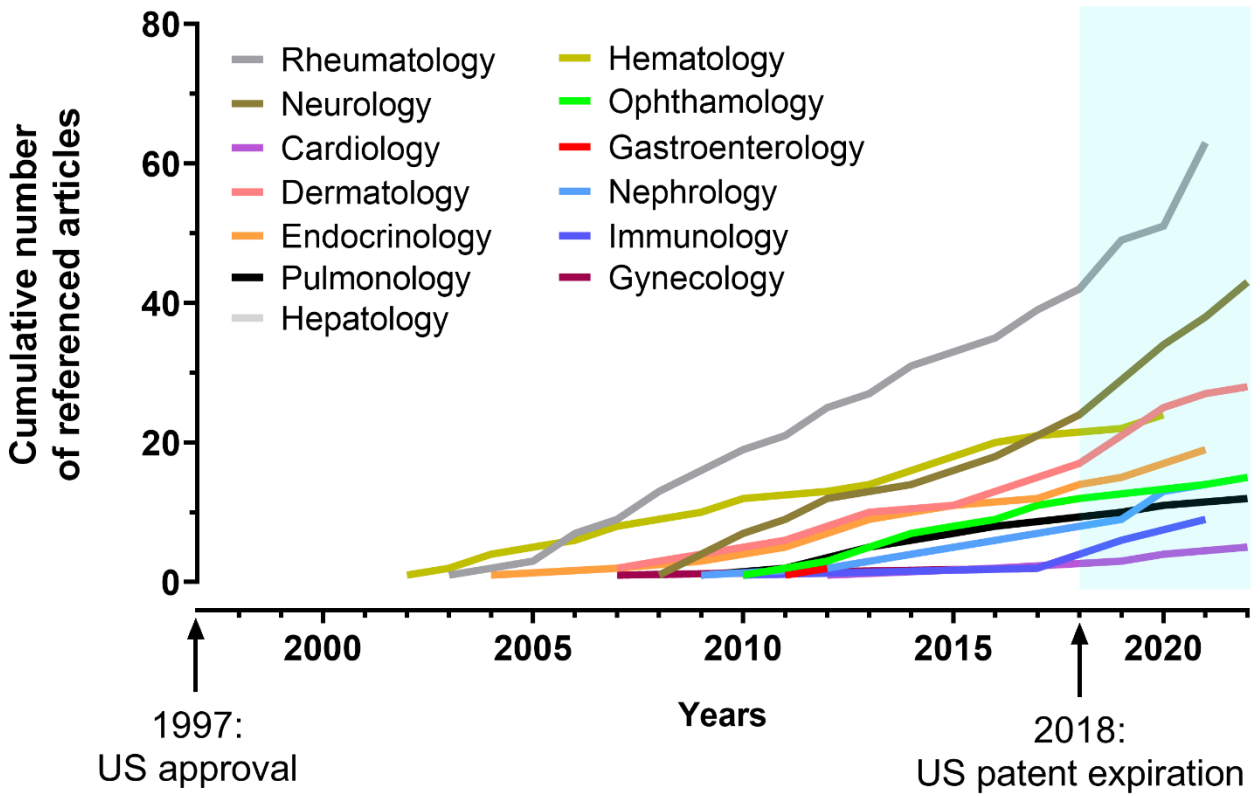

Figure 4

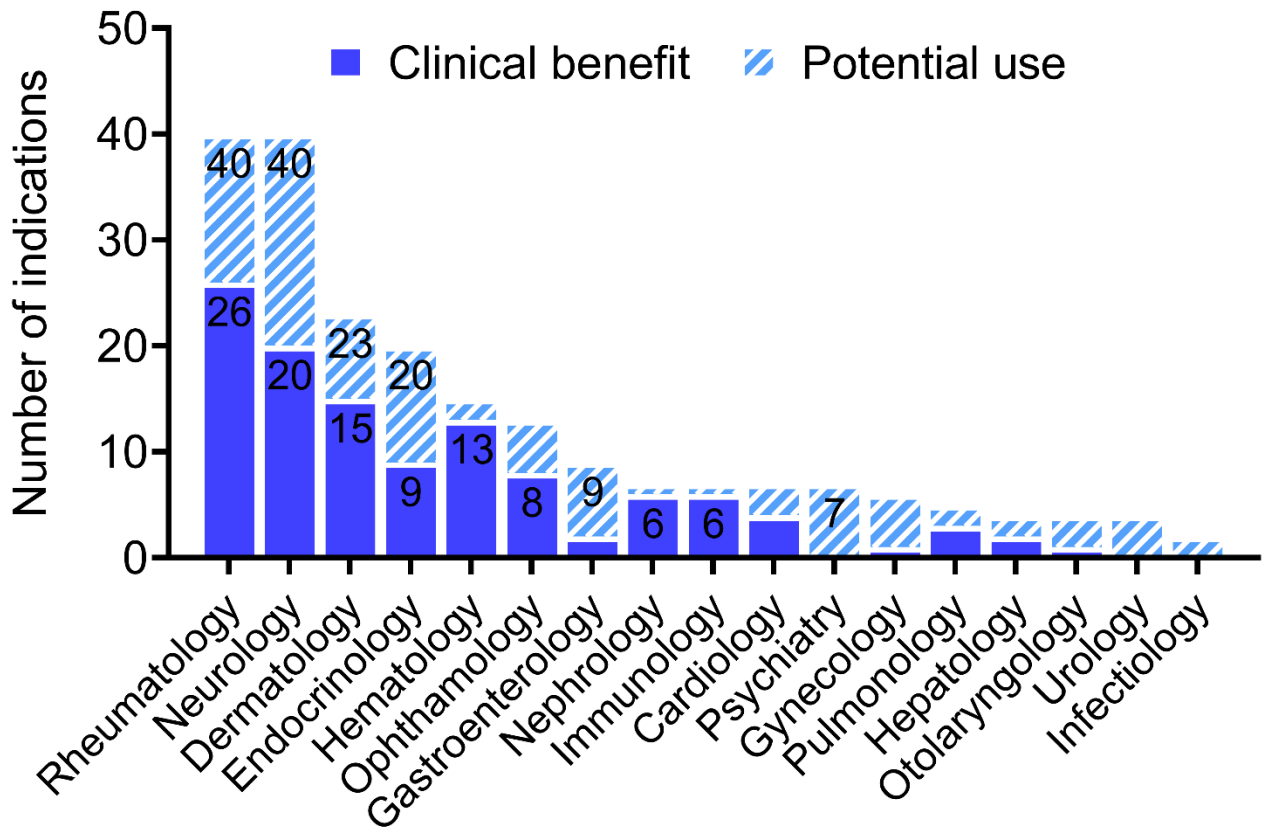



Table 1

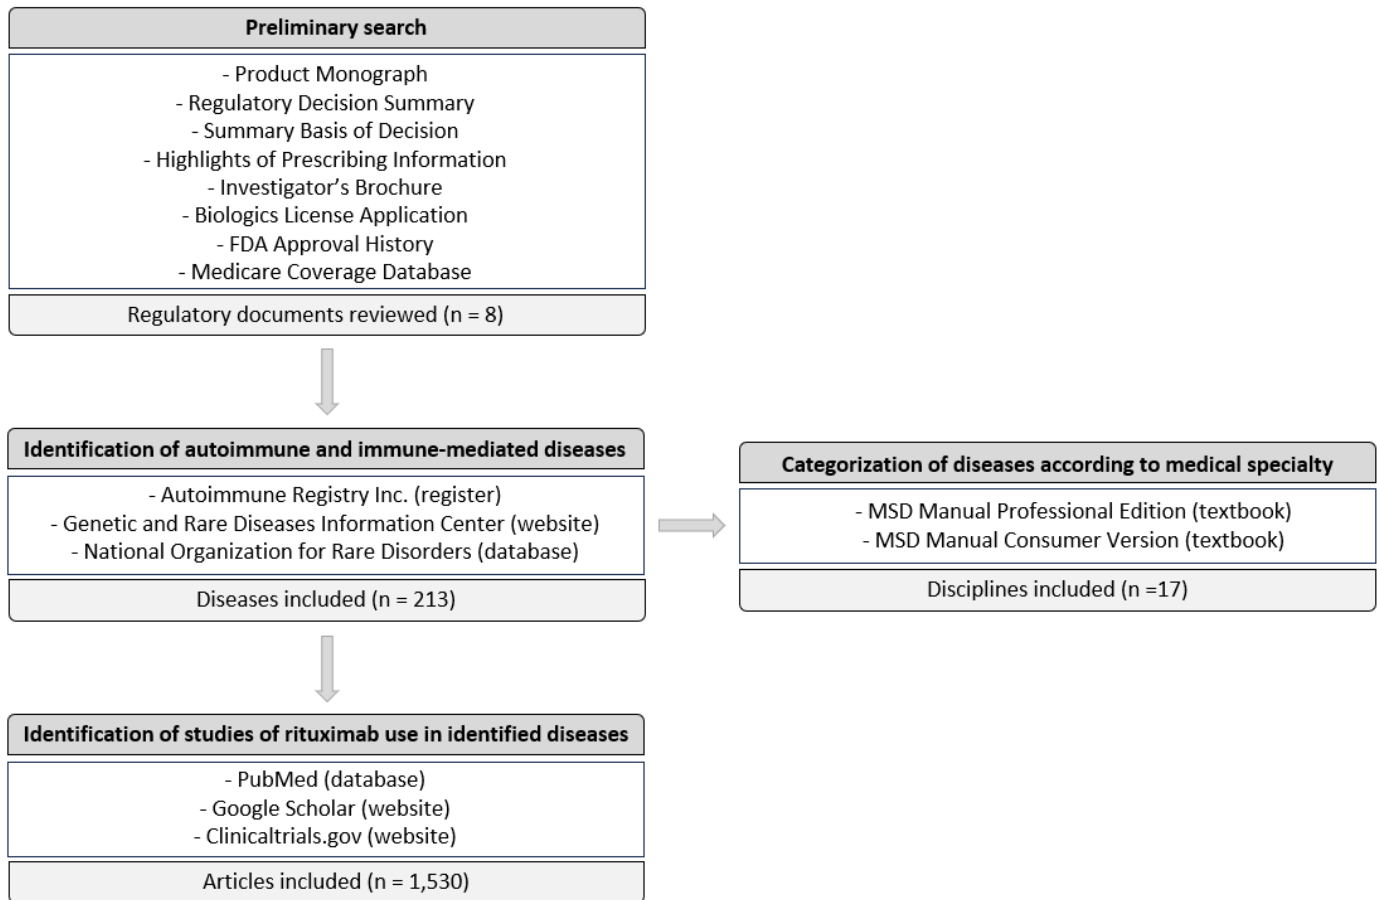

Source: https://medrxiv.org/content/10.1101/2023.09.22.23295633.full.pdf
